# Supplementary material
Source: PubMed Central journal article supplement (PMC5501874)
Supplement: mmc4.pdf [file mmc4.pdf]

# Integrative Genetic and Epigenetic Analysis Uncovers Regulatory Mechanisms of Autoimmune Disease

Parisa Shooshtari,<sup>1,2</sup> Hailiang Huang,<sup>2,3</sup> and Chris Cotsapas<sup>1,2,4,\*</sup>

Genome-wide association studies in autoimmune and inflammatory diseases (AID) have uncovered hundreds of loci mediating risk. These associations are preferentially located in non-coding DNA regions and in particular in tissue-specific DNase I hypersensitivity sites (DHSs). While these analyses clearly demonstrate the overall enrichment of disease risk alleles on gene regulatory regions, they are not designed to identify individual regulatory regions mediating risk or the genes under their control, and thus uncover the specific molecular events driving disease risk. To do so we have departed from standard practice by identifying regulatory regions which replicate across samples and connect them to the genes they control through robust re-analysis of public data. We find significant evidence of regulatory potential in 78/301 (26%) risk loci across nine autoimmune and inflammatory diseases, and we find that individual genes are targeted by these effects in 53/78 (68%) of these. Thus, we are able to generate testable mechanistic hypotheses of the molecular changes that drive disease risk.

## Introduction

The autoimmune and inflammatory diseases (AIDs) are a group of more than 80 common, complex diseases driven by systemic or tissue-specific immunological attack. This pathology is driven by loss of tolerance to self-antigens or chronic inflammatory episodes leading to long-term organ and tissue damage. Risk variants identified by genome-wide association studies (GWASs<sup>1,2</sup>) are preferentially located in non-coding regions with tissue-specific chromatin accessibility<sup>3–6</sup> and in transcriptional enhancer regions active after T cell stimulation.<sup>7</sup> Formal analyses partitioning the heritability of disease risk across different genomic regions support this enrichment,<sup>8</sup> with excess heritability localizing to tissue-specific DNase I hypersensitivity sites (DHSs).<sup>9</sup> Cumulatively, these results suggest that AID pathology is mediated by changes to gene regulation in specific cell populations but are not designed to identify individual regulatory regions mediating risk or the genes under their control. Several fine-mapping efforts have jointly considered genetic association and epigenetic modification data as a way to identify causal variants.<sup>10–12</sup> However, these efforts use epigenetic mark information to assess whether associated variants are likely to be causal, rather than to identify the regulatory sequences that mediate risk and the genes they affect.

We have therefore developed a systematic approach to identify regulatory regions mediating disease risk and thereby generate testable mechanistic hypotheses of the molecular changes that drive disease risk (Figure S1). For each association, we first calculate posterior probabilities of association from GWAS data and thence the set of

markers forming the 99% credible interval (CI).<sup>13–15</sup> We then overlap CI SNPs with DHSs in the region to identify which regulatory regions may harbor risk, and from these SNPs calculate the fraction of posterior probability attributable to each DHS. We chose DHSs as they are general markers of chromatin accessibility and typically only 150–390 base pairs long, compared to other histone modifications that can span tens to hundreds of kilobasepairs. Next, we identify genes controlled by each DHS by correlating chromatin accessibility state to expression levels of nearby genes.<sup>6,16,17</sup> We use the atlas of tissues available at NIH Roadmap Epigenomics Mapping Consortium (REMC) data,<sup>18,19</sup> where both DHSs and gene expression have been measured in the same samples. Finally, we combine the posterior probability of disease association of each DHS and the correlation between that DHS and the expression levels of nearby genes to calculate the probability that each gene is affected by the disease-mediating regulatory effect. We can thus estimate the probability that a gene influences disease risk.

## Material and Methods

### DNase I Hypersensitivity Data Peak-Calling, Clustering, and Quality Control

We obtained processed DNase I hypersensitivity (BED format) sequencing reads for 350 NIH Roadmap Epigenomics Mapping Consortium (REMC) samples<sup>18,19</sup> corresponding to 73 cell types (see Web Resources). For each sample, we called 150 bp DNase I hypersensitive sites (DHSs) passing a 1% FDR threshold.<sup>20</sup> We found 56 tissues with at least two replicates, which our statistical replication design requires, and limited our analysis to these (Table S1).

<sup>1</sup>Department of Neurology, Yale School of Medicine, New Haven, CT 06511, USA; <sup>2</sup>Program in Medical and Population Genetics and Stanley Center for Psychiatric Research, Broad Institute of Harvard and MIT, Cambridge, MA 02142, USA; <sup>3</sup>Analytic and Translational Genetics Unit, Department of Medicine, Massachusetts General Hospital and Harvard Medical School, Boston, MA 02114, USA; <sup>4</sup>Department of Genetics, Yale School of Medicine, New Haven, CT 06520, USA

\*Correspondence: [cotsapas@broadinstitute.org](mailto:cotsapas@broadinstitute.org)

<http://dx.doi.org/10.1016/j.ajhg.2017.06.001>

© 2017 American Society of Human Genetics.

**Table 1. Regulatory Fine-Mapping Resolves 78/301 Genome-Wide Significant Associations to Replicable DHSs and 53/78 to Single Genes across Nine Autoimmune and Inflammatory Diseases**

| Disease                       | Risk Loci                           |                                           | Regulatory Potential $\rho$ at 10% (5%) FDR        |                                  | Gene Pathogenicity $\gamma$ at 10% (5%) FDR          |                                                       |
|-------------------------------|-------------------------------------|-------------------------------------------|----------------------------------------------------|----------------------------------|------------------------------------------------------|-------------------------------------------------------|
|                               | Genome-wide Significant Association | $\geq 1$ Credible SNP in a Replicable DHS | Loci with Significant $\rho$ in $\geq 1$ Cell Type | Number of DHSs Explaining $\rho$ | Loci with Significant $\gamma$ in $\geq 1$ Cell Type | Genes with Significant $\gamma$ in $\geq 1$ Cell Type |
| Autoimmune thyroid disease    | 8                                   | 6                                         | 3 (1)                                              | 10 (3)                           | 3 (0)                                                | 8 (0)                                                 |
| Celiac disease                | 31                                  | 28                                        | 2 (2)                                              | 7 (7)                            | 2 (1)                                                | 8 (4)                                                 |
| Inflammatory bowel disease    | 125                                 | 97                                        | 19 (13)                                            | 102 (76)                         | 12 (8)                                               | 38 (18)                                               |
| Juvenile idiopathic arthritis | 22                                  | 17                                        | 9 (4)                                              | 118 (58)                         | 5 (2)                                                | 5 (2)                                                 |
| Multiple sclerosis            | 54                                  | 48                                        | 25 (17)                                            | 177 (118)                        | 17 (8)                                               | 49 (15)                                               |
| Primary biliary sclerosis     | 15                                  | 12                                        | 2 (1)                                              | 8 (6)                            | 2 (1)                                                | 7 (2)                                                 |
| Psoriasis                     | 24                                  | 19                                        | 3 (1)                                              | 26 (4)                           | 3 (1)                                                | 7 (1)                                                 |
| Rheumatoid arthritis          | 47                                  | 40                                        | 10 (8)                                             | 158 (113)                        | 7 (5)                                                | 20 (11)                                               |
| Type 1 diabetes               | 45                                  | 34                                        | 5 (4)                                              | 18 (14)                          | 2 (1)                                                | 5 (1)                                                 |
| Total                         | 371                                 | 301                                       | 78 (51)                                            | 555 (350)                        | 53 (27)                                              | 125 (45)                                              |

We tabulated 371 previously reported genome-wide associations in loci densely covered by the Immunochip across nine diseases. From publicly available Immunochip summary statistics, we calculated credible interval SNP sets explaining 99% of the posterior probability of association. In 301/371 cases, we found at least one CI SNP overlapping a replicable DHS, and significant excess of posterior probability on replicable DHSs (regulatory potential  $\rho$ ) in at least one of 22 Roadmap Epigenomics Project tissues in 78/301 cases. We were able to find significant evidence for individual genes in 53/78 loci. Overall, we prioritize 555 unique replicable DHS and 125 genes across 78 risk loci as likely to mediate disease risk.

Where more than two replicates were available, we chose the two replicates with the smallest Jaccard distance between their DHS peaks positions on the genome.

To identify corresponding DHSs across samples, we calculated the overlap between neighboring peaks across the 112 replicate samples as:

$$s_{ij} = O_{ij} / \max(l_i, l_j)$$

where  $O_{ij}$  is the number of base pairs shared by DHSs  $i$  and  $j$  and  $l_i$  and  $l_j$  are the length of DHSs  $i$  and  $j$ , respectively. We then grouped DHSs with a graph-based approach, the Markov clustering algorithm<sup>21</sup> (MCL), using the default parameters, and defined the coordinates of a DHS cluster as the extreme positions covered by DHS peaks included in that cluster. Finally, we define each cluster as accessible in a sample if we observe at least one DHS peak within its boundaries in that sample (Figure S2).

Both peak calling and MCL clustering are naive to sample labels, so we can test for evidence that DHS clusters replicate in this analysis. We expect that DHS clusters representing true regulatory regions should be consistently accessible or unaccessible in replicate samples. We can thus calculate a replication statistic for DHS cluster  $d$  as:

$$S_d = -2 \times \ln \left( \frac{p^{2n_1} \times (2pq)^{n_2} \times q^{2n_3}}{a^{n_1} \times b^{n_2} \times c^{n_3}} \right); S \sim \chi_1^2$$

where  $n_1$  is the number of cell types where DHS cluster  $d$  is active in both replicates;  $n_2$  is the number of cell types where the cluster is active in only one of the two replicates; and  $n_3$  is the number of cell types where the cluster is inactive in both replicates. For  $N = 56$  tissues in our data,  $a = n_1 / N$ ,  $b = n_2 / N$ , and  $c = n_3 / N$ . Further, if  $r$  is the number of samples where DHS cluster is active, then  $p = r / (2 \times N)$  and  $q$  is  $1 - p$ . Note that we distinguish between the number of cell types ( $N = 56$ ) and number of samples considered ( $2 \times N = 112$ ). We expect  $S_d$  to follow a  $\chi_1^2$  distribution,

and we selected DHS clusters passing a nominal significance threshold of  $p_d \leq 0.05$ , which we term replicable DHS. Overall, we found that replicable clusters tend to be active in more cell types and show a much higher level of concordance across replicate samples than those that do not replicate (Figure S3). To assess whether replicable DHSs capture the majority of disease-relevant signal, we compared the proportion of disease heritability ( $h^2g$ ) explained by all DHS-detected peaks in a tissue to that explained by the active replicable DHSs we annotated.<sup>8</sup> For this we used genome-wide association summary statistics for MS<sup>22</sup> and IBD.<sup>23</sup> We note that replicable DHSs active in immune tissues cover a smaller percentage of the autosomal genome than those active in other tissues (Figure S4).

### Credible Interval Mapping for Immunochip Loci

We obtained publicly available summary association statistics from case/control cohorts profiled on the Immunochip (Immunobase, see Web Resources; accessed May 2015) for autoimmune thyroid disease (AITD),<sup>24</sup> celiac disease (CEL),<sup>25</sup> inflammatory bowel disease (IBD),<sup>26</sup> juvenile idiopathic arthritis (JIA),<sup>27</sup> multiple sclerosis (MS),<sup>14</sup> primary biliary cirrhosis (PBC),<sup>10</sup> psoriasis (PSO),<sup>28</sup> rheumatoid arthritis (RA),<sup>29</sup> and type 1 diabetes (T1D)<sup>30</sup> (Table 1). For each of these nine diseases, we compiled a list of genome-wide significant associations from the largest published GWASs.<sup>14,23–25,27–31</sup> We then pruned this list of lead SNPs to include only those that overlap densely genotyped regions of Immunochip data and were present in the 1000 Genomes European ancestry cohorts.<sup>32</sup> We excluded the major histocompatibility complex (MHC) region on chromosome 6, where fine-mapping has been previously reported.<sup>4</sup> As summary statistics for conditional associations are not available, we limited our analyses to primary reported signals in each disease.

We identified credible interval SNPs explaining 99% of the posterior probability of association for the remaining lead SNPs.<sup>13,15</sup>

For each lead SNP, we identified SNPs within 2 Mb in linkage disequilibrium  $r^2 \geq 0.1$  in the non-Finnish European 1000 Genomes reference panels.<sup>32</sup> For each set  $S$  of these SNPs, we calculated posterior probabilities of association as

$$PP_s = e^{\chi_s^2/2} / \sum_{i \in S} e^{\chi_i^2/2}$$

where  $\chi_i^2$  is the ImmunoChIP association chi-square test statistics of SNP  $i$ . We then selected the smallest number of SNPs required to explain 99% of the posterior probability. We note that this approach assumes that a single causal variant underlies the association and that it has been genotyped or imputed in the samples.

### Calculating Regulatory Potential of Disease Loci

We first overlapped credible interval (CI) SNPs with our replicable DHSs, then computed the posterior probability of association attributable to each replicable DHS  $d$  in tissue  $t$  as

$$\rho_{d,t} = \sum_{s \in CI} PP_s \times O_d(s) \times A_{d,t},$$

where  $PP_s$  is the posterior probability of association for SNP  $s$ .  $O_d(s)$  is equal to 1 if SNP  $s$  is located on replicable DHS  $d$  or the 100 bp flanking region each side of replicable DHS  $d$ , and it is 0 otherwise.  $A_{d,t}$  is 1 if DHS  $d$  is active in tissue  $t$  or 0 otherwise. For SNPs overlapping two or more replicable DHSs or their 100 bp flanking regions, we divided its posterior probability  $PP_s$  between those replicable DHSs equally.

We then calculated the tissue-specific regulatory potential of each disease risk locus over  $D$ , the set of replicable DHSs active in tissue  $t$  as  $\rho_t = \sum_{d \in D} \rho_{d,t}$ , and used a coordinate-shifting approach to assess significance empirically.<sup>33</sup> In each of 40,000 permutations, we randomly re-assigned genomic coordinates to each replicable DHS within the locus, preserving its size and recalculated  $\rho_{d,t}$  and calculated significance as the proportion of permutations that give values of  $\rho_{d,t}$  greater than the observed. We corrected for multiple testing in each disease using the false discovery rate.<sup>33</sup>

Finally, we then calculated the overall regulatory potential of each disease locus over all tissues as

$$\rho = \sum_{d \in D} \sum_{s \in CI} PP_s \times O_d(s).$$

To assess the statistical power of our framework, we performed a series of simulations where we specified either one or two causal variants in a locus (as previously described in Chun et al.<sup>34</sup>). In brief, we selected one REMC cell type, fetal kidney, from which to draw replicable DHS data for these simulations. We performed positive simulations where the causal variant is on a replicable DHS, and negative simulations where it is not. For two variants, we performed positive simulations where the first causal variant is on a replicable DHS and the second is not, and negative simulations where neither is on a replicable DHS (Figure S5).

### Calculating Pathogenicity Factors of Association for Each Gene in a Risk Locus

There are 88 NIH Roadmap Epigenomics Mapping Consortium (REMC) samples corresponding to 27 cell types profiled on the Affymetrix HuEx-1\_0-st-v2 exon array, which we downloaded as raw CEL files (see [Web Resources](#); accessed September 2013). We processed these data using standard methods available from the BioConductor project.<sup>35</sup> In brief, we filtered cross-hybridizing

probe sets, corrected background intensities with RMA, and quantile normalized the remaining probe set intensities across samples. We then collapsed probe sets to transcript-level intensities and mapped transcripts to genes using the current Gencode annotations for human genes (v.12), removing any transcripts without a single exact match to a gene annotation. We then identified the 22 tissues with matched DHS data (Table S1), averaged measurements over all replicates of each tissue, and quantile normalized the resulting dataset, comprising 13,822 transcripts mapping to 13,771 unique gene IDs.

We identified all genes within 1 Mb of the lead SNP for each locus, and for all replicable DHSs with ( $\rho_d > 0$ ), computed the correlation between transcript levels and DHS accessibility across the 22 REMC tissues with a two-sided Wilcoxon rank sum test  $w$ . To account for the correlation between gene expression levels, we assessed the significance of the rank sum test empirically. We removed the correlation induced both between genes and across tissues from the matrix of gene expression levels to ( $W_{PCA}$ ) using PCA whitening, which results in random variables with the same distributional characteristics as the original data. We then re-imposed the correlation structure due to related tissues on these random data by multiplying by the Cholesky decomposition of the gene expression covariance matrix ( $L$ ), such that  $G_{Null} = L'W_{PCA}$ .  $G_{Null}$  thus reflects the expected values of gene expression in the REMC tissues we analyzed if no replicable DHS affects expression. We then computed the Wilcoxon rank sum test statistic between each replicable DHS  $d$  and all genes of  $G_{Null}$ . This formed our null Wilcoxon rank sum test statistics ( $W_{Null}^d$ ). From this null, we computed empirical p values as

$$P_{d,g} = \frac{2 \times (1 + |W_{Null}^d > w_g^d| + |W_{Null}^d = w_g^d| / 2)}{1 + |W_{Null}^d|},$$

where  $w_g^d$  is the Wilcoxon rank sum test statistic between replicable DHS  $d$  and gene  $g$ , and  $|\cdot|$  denotes the number of events satisfying the enclosed criterion. This formulation accounts for the two-sided test and corrects for the inflation in  $w_g^d$  caused by the correlation between tissues (Figure S6).

We next calculated per-gene  $g$  pathogenicity factor in tissue  $t$  as

$$\gamma_{g,t} = \sum_{d \in D} \rho_{d,t} \times e^{\chi_{d,g}^2/2},$$

where  $\chi_{d,g}^2$  is the chi-square test statistic corresponding to the empirical correlation p value for replicable DHS  $d$  and gene  $g$ .

We assess the significance of  $\gamma_{g,t}$  by random permutation. In each locus, we establish how many replicable DHSs harbor CI SNPs, then construct the null distribution of  $\gamma_{g,t}$  by randomly selecting that number of replicable DHSs across the locus and re-computing  $\gamma_{g,t}$ . We calculated significance as the proportion of 50,000 permutations that give values of  $\gamma_{g,t}$  greater than the observed value, correcting for the number of genes within each locus with FDR.

### Enrichment of Allele-Specific Accessibility, Tissue Specificity, and Functional Class for Replicable DHSs

We obtained a list of 362,284 SNPs overlapping DHS peaks in the Roadmap Epigenome Project data, which Maurano et al.<sup>36</sup> tested for allele-specific DHS accessibility (ASA). Those authors found that 64,597/362,284 (18%) SNPs showed significant differences in accessibility at 5% FDR, giving us a genome-wide expectation for ASA. We then calculated whether credible interval SNPs

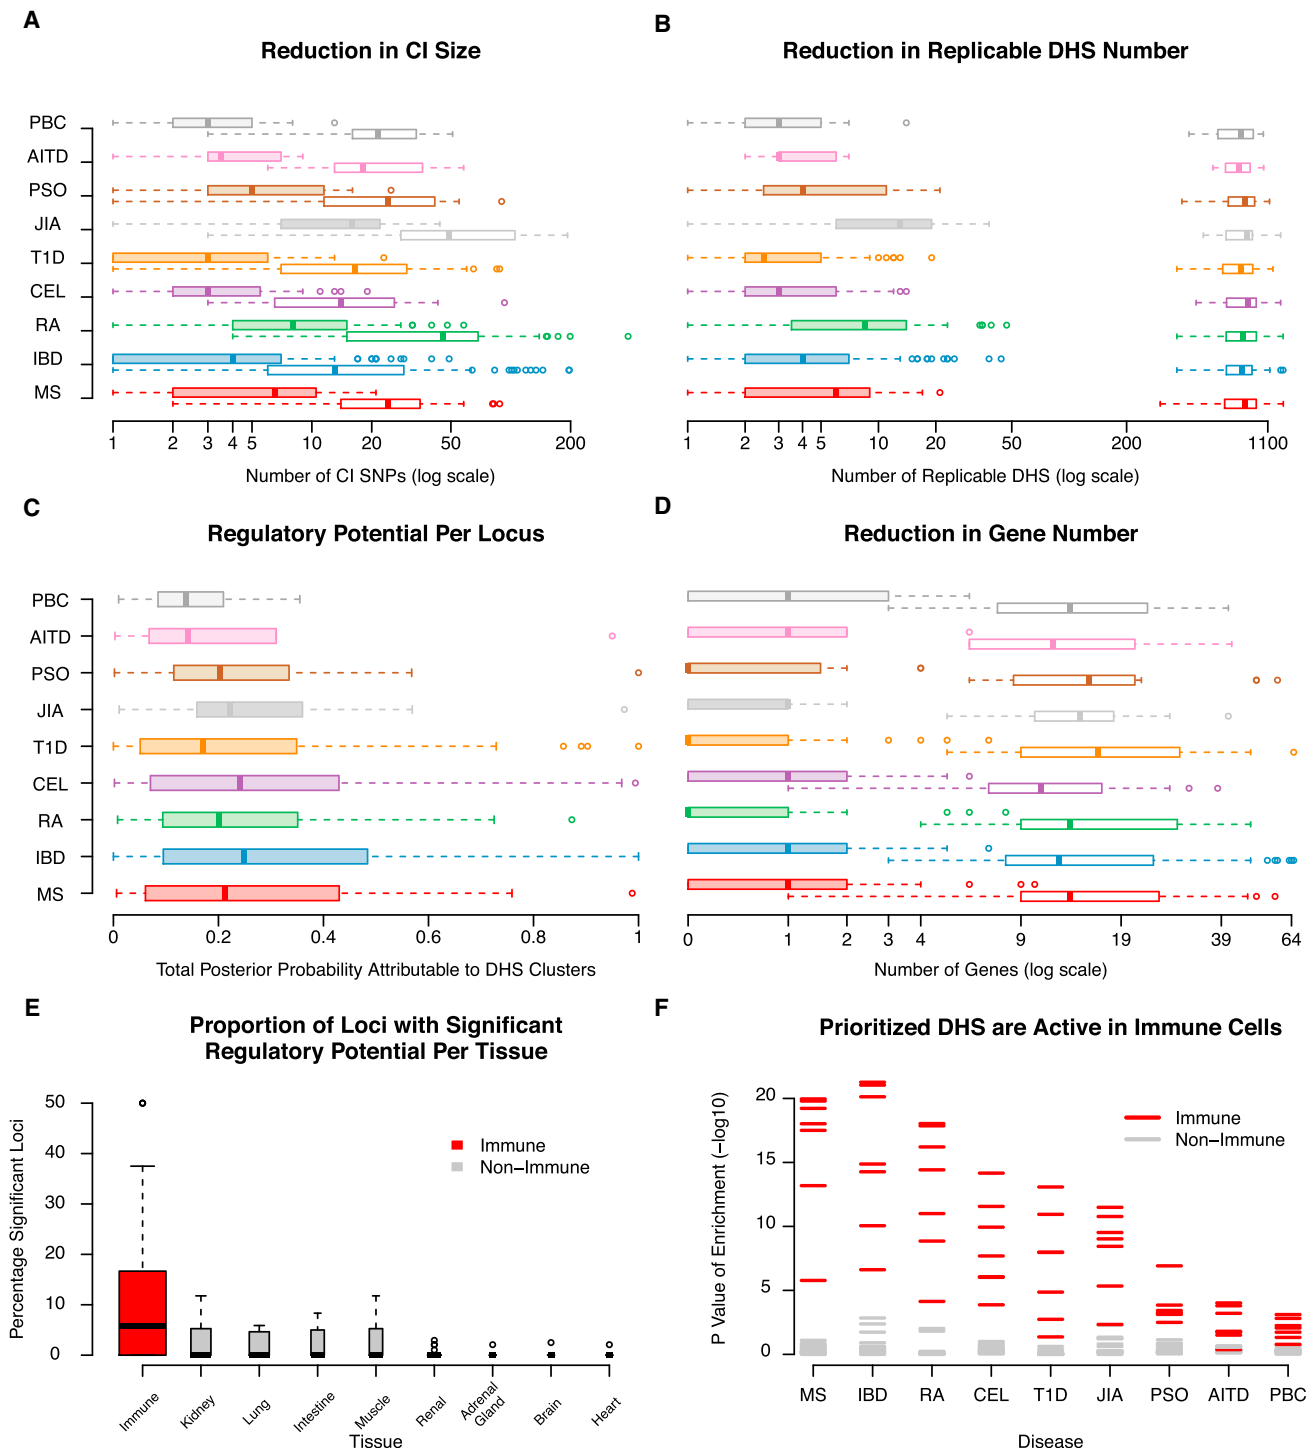

**Figure 1. Regulatory Fine-Mapping Identifies Specific Genes and Regulatory Regions Driving Risk in 301 Loci Associated to One of Nine Autoimmune Diseases**

We combined credible interval (CI) mapping and DNase I hypersensitivity site (DHS) clustering in a statistical framework to identify GWAS loci where risk is likely to be mediated by variants in gene regulatory regions across nine autoimmune diseases (denoted by different colors). In those loci we then correlate the accessibility state of replicable DHSs with the expression of nearby genes to identify pathogenic genes.

(A) Only a subset of CI SNPs in each risk locus (open boxplots) are located on DHSs (filled boxplots).

(B) Only a small fraction of DHSs in each risk locus (open boxplots) harbor CI SNPs (filled boxplots).

(C) Most of the posterior probability of disease risk association (regulatory potential) is located on replicable DHSs, with 78/301 (26%) of loci showing significant enrichment of risk on DHSs (FDR 10%).

(D) By correlating DHS accessibility and gene expression, we find that only a subset of all genes in each locus (open boxplots) show significant probability of being regulated by risk variants (filled boxplots), with individual genes reaching significance in 53/78 (68%) of loci (FDR 10%).

(legend continued on next page)

overlapping DHSs from our analysis are more likely to show ASA than the genome-wide expectation, using Fisher's exact test. Because some diseases have only a small number of loci associated at genome-wide significance, we pooled results across all nine AIDs for this analysis.

To test whether replicable DHSs harboring credible interval SNPs (burdened replicable DHSs) are preferentially active in each tissue, we compared the proportion of active burdened replicable DHSs to the proportion of all replicable DHSs active in that tissue with Fisher's exact test. We used the same approach to determine enrichment for functional categories defined by ChromHMM<sup>37</sup> and identified genomic functions of replicable DHSs through overlapping them with annotated ChromHMM regions (Figure S7).

## Results

DHS peaks, as all epigenetic marks, are called in each sample separately.<sup>20</sup> We therefore clustered DHS peaks to identify those corresponding to the same underlying regulatory site, so we could correlate accessibility state of the same site to gene expression data (Figure S2). In 56 REMC tissues with at least two replicate DHS sequencing runs, we called 22,060,505 narrow-sense 150 bp peaks at a false discovery rate  $FDR < 1\%$ , which fell into 1,994,675 DHS clusters of 150–390 bp each, covering 14.8% of the autosomal genome (Figure S8). Of these, 1,079,138 (54.1%) covering 8.5% of the genome passed nominal significance in a statistical replication test ( $\chi^2_1$  test,  $p < 0.05$ ). We found that common variants on this subset of peaks explains essentially all the heritability of both multiple sclerosis and inflammatory bowel disease that is captured by variants residing in the full set of DHS peaks, indicating that they represent the majority of regulatory regions relevant to AID risk (Figure S9). Of these 56 REMC tissues, 22 also have gene expression measurements, from which we calculated the correlation between accessibility state of 796,747 replicable DHSs active in at least one of these tissues, and transcript levels for 13,771 genes. As these represent a diverse sampling of organ systems, we avoid limiting our hypotheses to tissues previously suspected of driving pathogenesis while maximizing the sources of data we can utilize. We note our framework can be used with any regulatory feature and expression dataset and is publicly available (see Web Resources).

With this framework, we dissected 301 associations to one of nine AIDs, using publicly available summary association statistics from samples genotyped on the Immuno-chip, a targeted genotyping array from Immunobase<sup>38,39</sup> (see Web Resources; Table 1). These associations reside in loci genotyped at high density on the Immuno-chip so that common variants are completely ascertained, and

have been previously reported at genome-wide significance.<sup>13,14</sup> We excluded the major histocompatibility locus, where complex LD patterns make credible interval mapping challenging.<sup>40</sup> For each association, we calculated posterior probabilities of association for all markers and defined credible interval SNP sets.<sup>13,15</sup> We find a median of 4 (standard deviation,  $SD = 7.8$ ) replicable DHSs overlap CI SNPs, out of a median 822 ( $SD = 205.2$ ) replicable DHSs in each 2 Mb window around an association, indicating that this data integration step alone vastly reduces the number of potentially disease-relevant regulatory regions (Figure 1).

To establish how likely each association is to be mediated by variation in regulatory regions, we compute their regulatory potential  $\rho$ , as the proportion of the posterior probability of association localizing to replicable DHSs. We then assess the significance of  $\rho$  by permutation, randomly reassigning the positions of all replicable DHSs in the locus.<sup>3</sup> As most regulatory regions are active in only a subset of tissues, we do this for each REMC tissue independently, only considering the replicable DHSs active in that tissue. We find that 78/301 (26%) of loci show significant  $\rho$  in at least one REMC tissue at a false discovery rate (FDR) of 10% (51/301 at FDR 5%; Table 1). From simulations, we find that our method has good power to detect true cases of such regulatory potential, even in cases where two independent causal variants exist in a locus (Figure S5). Consistent with previous observations,<sup>4,7,41</sup> we find that risk often localizes to replicable DHSs active in immune cell subpopulations (Figure 1), though the number of replicable DHSs active in these subpopulations is small (Figure S10). We reasoned that if replicable DHSs harboring CI SNPs actually mediate risk, their accessibility state should be perturbed by the variants they harbor<sup>36</sup> and they should be accessible in disease-relevant cell populations. We find that, as a group, CI SNPs on DHSs are more likely to be associated to allele-specific accessibility than non-CI SNPs on replicable DHSs (Fisher exact test  $p = 7 \times 10^{-6}$ ) and that this enrichment is consistent across minor allele frequency bins (Figure S11). We also found that replicable DHSs harboring CI SNPs are more likely to be accessible in immune cell subpopulations (Figure 1). These results show that our approach identifies regulatory regions affected by variants likely to influence disease risk, supporting the view that alteration of gene regulatory region accessibility is a major mechanism of disease risk.

Having validated that our analysis was identifying genuine regulatory risk effects, we next turned to identifying specific disease-mediating replicable DHSs and the genes they control in the 78 loci with significant  $\rho$  ( $FDR < 0.1$ ; Tables 1, S2, and S3). We found that a median

---

(E) Immune cell subpopulations have a higher proportion of loci with risk localizing to active DHSs compared to tissues from other organ systems.

(F) DHSs harboring CI SNPs are more likely to be accessible in immune cell subpopulations than in other tissues. Overall, we find that 78/301 (26%) of loci associated to one of nine autoimmune diseases show significant evidence that risk is mediated by genetic variants on specific regulatory sequences.

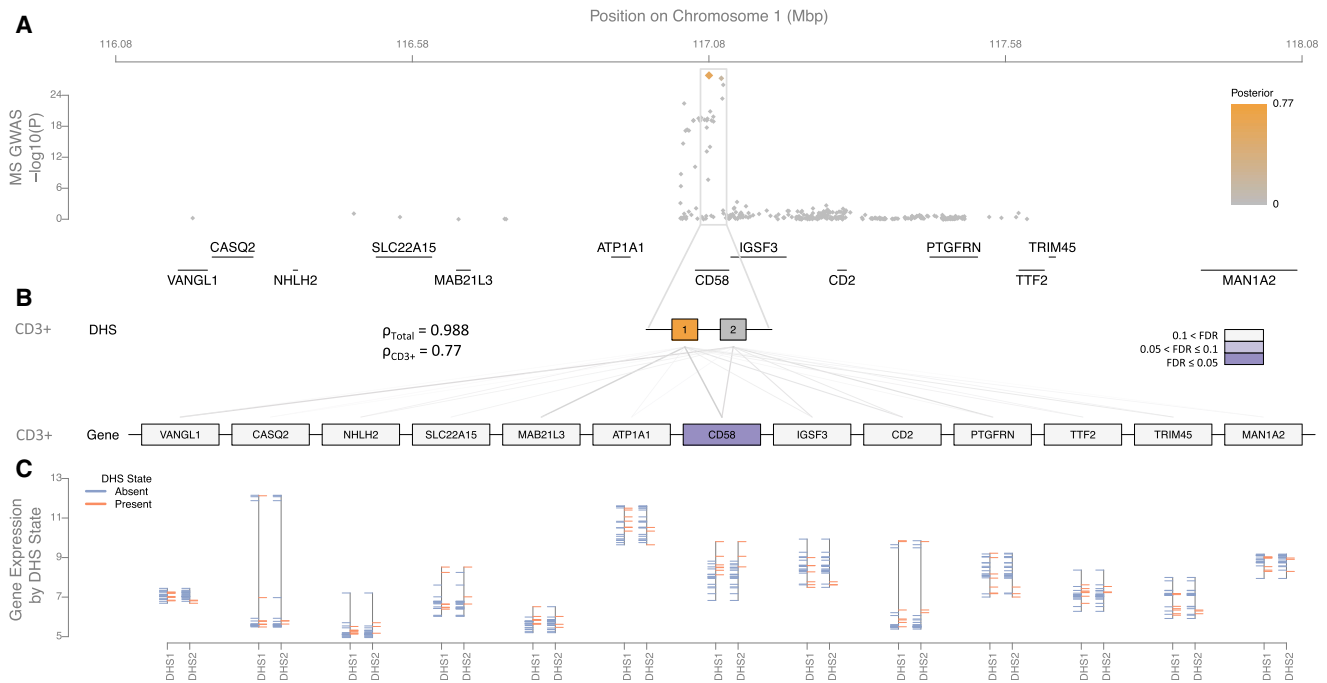

**Figure 2. Regulatory Fine-Mapping Identifies Two Replicable DHSs and Changes to *CD58* Regulation in  $CD3^+$  T Cells as Mediating Multiple Sclerosis Risk on Chromosome 1**

A genome-wide significant association on chromosome 1 localizes to the *CD58* locus (A), and 98.8% of the posterior probability of association (orange) localizes to replicable DHSs in the locus (B). Different combinations of replicable DHSs are active in each of the Roadmap Epigenomics Project tissues we examined; the enrichment is most significant in replicable DHSs active in  $CD3^+$  T cells (77% of the overall posterior probability;  $FDR < 0.1$ ). The expression levels of each gene in the locus can be correlated to the accessibility state of each replicable DHS (gray lines). By partitioning the posterior probability of association attributable to each replicable DHS by the strength of this correlation, we find that *CD58* shows significant enrichment (purple,  $FDR < 0.05$ ). The expression level of *CD58* is markedly higher in tissues where the replicable DHSs we identify are accessible (orange) than in tissues where they are inaccessible (blue; C).

of three replicable DHSs ( $SD = 4.6$ ) account for  $>90\%$  of the total association posterior attributable to all replicable DHSs in these loci, a phenomenon independent of the total regulatory potential in a locus (Figure S12). This indicates that we can resolve most loci to a small number of candidate regulators. To identify the genes likely to mediate pathogenesis in each locus, we correlated the accessibility state (open or closed) of each replicable DHS to the expression levels of nearby genes. As we found wide-spread correlation between replicable DHS accessibility and gene expression (a median of 353/822 replicable DHSs per locus, at a correlation  $p < 0.05$ , Figure S13), we explicitly tested the evidence that each gene is excessively correlated to risk-mediating replicable DHSs as the pathogenicity factor  $\gamma$ . As with  $\rho$ , we establish the significance of  $\gamma$  in each tissue by permutation. We find at least one significant gene in at least one tissue in 53/78 loci ( $FDR < 0.1$ ), indicating that we can identify the likely targets of the regulatory regions represented by these replicable DHSs (summarized in Figure 1 and Table 1, with detailed entries in Table S3). Surprisingly, these genes are not the closest to the most associated variant in 38/53 (72%) of cases, and in 45/53 (85%) were not the closest gene to the replicable DHS with the highest regulatory potential, suggesting that risk-relevant regulatory regions exert influence over genes at considerable distances (Table S3). The

replicable DHSs with significant  $\rho$  values are more likely to be marked as active enhancers of transcription, further supporting this conclusion (Figure S7). In the 25/73 loci where we could not identify a gene target, we found that the replicable DHSs with the highest  $\rho$  are not correlated to any gene in the REMC data (Figure S14), suggesting they either affect genes not captured there or represent regulatory regions with different functions.

In several cases, we found evidence supporting a previous hypothesis for a causal gene in a locus. For example, an association to multiple sclerosis (MS) risk on chromosome 1 shows significant regulatory potential in T cells and macrophages. This is driven by CI SNPs on two replicable DHSs, both of which implicate *CD58* (Figure 2). *CD58* encodes lymphocyte-function associated antigen 3 (LFA3), a co-stimulatory molecule expressed by antigen-presenting cells, mediating their interaction with circulating T cells by binding lymphocyte-function associated antigen 2 (LFA2).<sup>42</sup> The latter is encoded by the *CD2* immediately proximal to *CD58* but does not show strong evidence of control by risk-mediating replicable DHSs. The protective MS effect in this region is associated with an increase in *CD58* expression, leading to an up-regulation of the transcription factor *FoxP3* via *CD2*. This results in enhanced functioning of  $CD4^+CD25^{\text{high}}$  regulatory T cells, thought to be defective in MS-affected

individuals.<sup>42</sup> Similarly, we find significant evidence for *EOMES* and *SLC4A7* regulation in CD3<sup>+</sup> T cells for another MS association on chromosome 3 (Figure S15) and *IRF8* regulation across immune cell subpopulations for a rheumatoid arthritis (RA) association on chromosome 16 (Figure S16).

Many Immunochip loci harbor associations to multiple diseases, suggesting that a portion of risk is shared.<sup>43,44</sup> Consistent with this observation, we found that 42 Immunochip loci had nominally significant  $\rho$  for at least one cell type for more than one disease, representing 107 of the 301 initially considered associations. Of these, 25/42 loci showed regulatory potential in two AIDs, and twelve, four, and a single locus showed regulatory potential in three, four, and five AIDs, respectively. Due to the correlation imposed by linkage disequilibrium, it remains challenging to conclude that associations to different traits in the same locus represent a true shared effect, where the same underlying causal variant drives risk for multiple diseases.<sup>45</sup> We therefore sought to establish whether associations to different diseases in these 42 loci identify the same replicable DHSs and prioritize the same genes, and we found striking examples of shared and distinct effects across these 42 loci. For example, five diseases show genetic association to a region of chromosome 6, with the most significant SNPs residing in the coding region of *BACH2* (Figure 3). We found significant regulatory potential in T cell subsets for autoimmune thyroid disease (AITD), MS, and type 1 diabetes (T1D), which independently localize to the same replicable DHS in the three diseases. We found weaker evidence for regulatory potential in both celiac disease (CEL) and IBD across most immune tissues, with the IBD evidence also supporting a role for major organs including the intestine. These results are nominally significant but do not pass our FDR threshold in either disease. In the first three diseases, we can independently prioritize a single gene, *MDN1*, as the most likely target gene for these effects, with no significant evidence for *BACH2*. In contrast, we found no significant evidence for any gene in either CEL or IBD, despite the credible intervals for these diseases essentially overlapping those for AITD, MS, and T1D (Figure 3). We note that the most associated SNPs for MS, AITD, and T1D are the same (rs72928038), and the  $r^2$  between this SNP and the most associated SNPs of IBD (rs1847472) and CEL (rs7753008) are 0.34 and 0.25, respectively. Similarly, a region on chromosome 1 harbors associations to both IBD and T1D. We found significant regulatory potential in CD3<sup>+</sup> T cells for both diseases, and independently prioritize a single gene, *IL19*, as the most likely target for these effects (Figure S17). We are thus able to begin resolving associations across multiple diseases into shared and distinct effects in the same locus.

To more generally assess how our approach resolves shared associations, we compared the overlaps between most associated markers, credible interval sets, replicable DHSs harboring CI variants, and genes identified across

the 42 loci (Table 2). We found more overlap than expected by chance for each comparison (hypergeometric  $p \ll 0.001$ ), indicating that both genetic association data and regulatory region data point toward shared effects. Furthermore, we found that the extent of this overlap increased as we moved from comparing lead SNPs to prioritized replicable DHSs and genes (Fisher exact test between proportion of lead SNPs and prioritized genes  $p = 5 \times 10^{-6}$ ). This increase in concordance holds true when we consider only the 25 loci harboring two disease associations, indicating that our conclusions are not based on biases in a minority of loci harboring many associations (Table S4). We found that the rate of prioritized gene overlap is correlated to linkage disequilibrium between lead variants, suggesting that though GWASs may not identify precisely the same variant in two separate diseases, shared effects can clearly be identified by considering the likely functional effects in a locus (Figure S18). Overall, we find significant evidence for at least one gene across multiple diseases in 17/42 loci, and these are the same genes in 12/17. We find that this is due to overlapping replicable DHSs identified across diseases in 11/12 of these cases, suggesting that the same mechanistic effect drives risk to multiple diseases. Thus, our approach can uncover biological pleiotropy<sup>46</sup> across diseases even when the identity of the causal variant remains unknown, beyond the comparison of credible interval sets.

## Discussion

We have described an approach to detect gene regulatory regions driving disease risk and through them, the genes likely to mediate pathogenesis, through robust re-analysis of public data. We find substantial evidence of regulatory potential in a substantial proportion of loci across nine AIDs and we resolve these to individual genes in 53/78 (68%) controlled by regulatory regions active in immune cells. In loci with no substantial evidence of regulatory potential, we suggest that the risk effect is mediated either by coding variation<sup>47</sup> or by regulatory regions in immune cell subpopulations and physiological contexts not adequately represented in the REMC datasets. Thus, as profiles for more cell types and physiological contexts are collected, we expect not only that more AID loci may yield to such dissection, but that traits and diseases for which data on the relevant tissues are not presently available may also be interrogated. Some portion of these loci may also harbor multiple independent causal variants with equivalent effect sizes, which erode our power to detect regulatory potential even when one of these causal variants is located on a regulatory region. We note that our approach will also apply to summary statistics from densely imputed genome-wide genotyping platforms, though care should be taken when comparing results across studies as we do in the present report, as differences in imputation strategies may induce false positives and negatives to such comparisons.

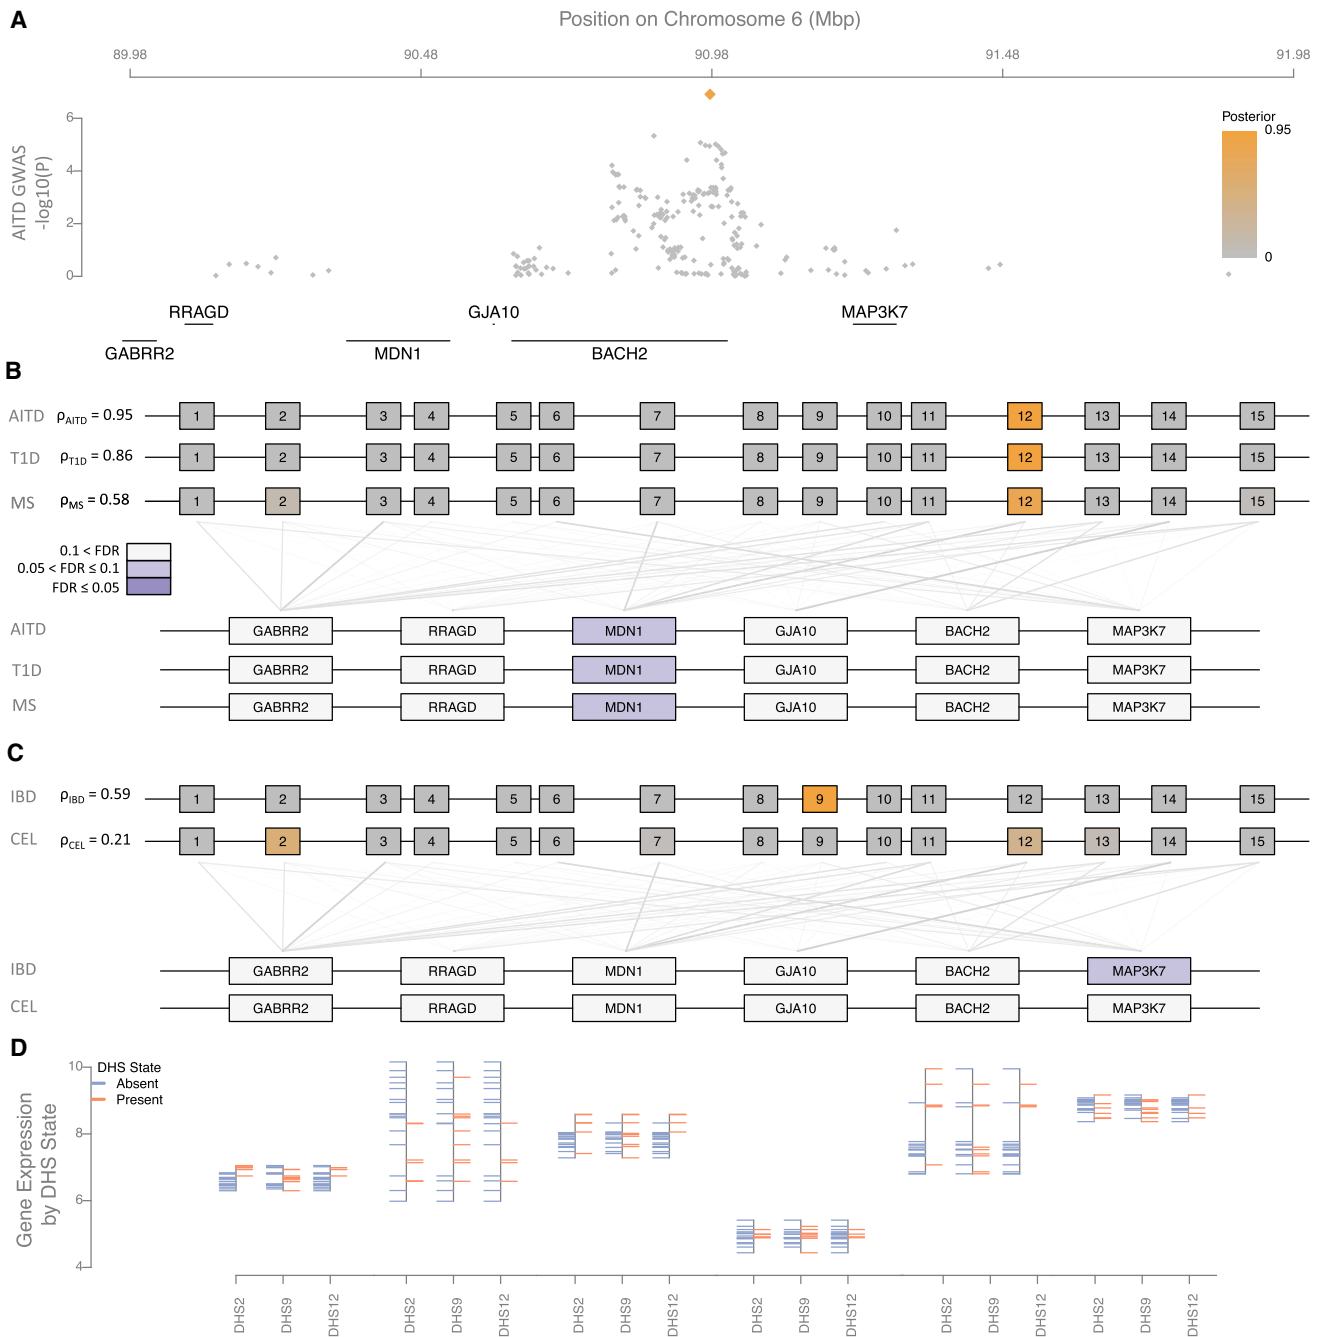

**Figure 3. Regulatory Fine-Mapping on Chromosome 6 Identifies a Single Replicable DHS and Changes to *MDN1* Regulations, not *BACH2*, in  $CD3^+$  T Cells, as Driving Risk to Autoimmune Thyroid Disease, Multiple Sclerosis, and Type 1 Diabetes**

Association to five autoimmune diseases localizes to the coding region of *BACH2* (autoimmune thyroid disease in A; others are shown in Figure S19). We found significant regulatory potential in  $CD3^+$  T cell subsets for autoimmune thyroid disease (AITD), multiple sclerosis (MS), and type 1 diabetes (T1D), which independently localize to the same replicable DHS in the three diseases (B). In each case, we can independently prioritize a single gene, *MDN1*, as most likely target gene for these effects, with no significant evidence for *BACH2*. We found weaker evidence for regulatory potential in both celiac disease (CEL) and inflammatory bowel disease (IBD) across most immune tissues, including  $CD3^+$  T cells (C), which stems from two different replicable DHSs than the signal in AITD, MS, and T1D. This evidence does not pass our FDR threshold in either disease. In neither case do we find any evidence to support either *MDN1* or *BACH2* in these diseases. The expression level of *MDN1* is markedly higher in tissues where the three replicable DHSs we identify are accessible (orange) than in tissues where they are inaccessible (blue; D).

Our approach generates specific hypotheses about pathobiology that are often beyond what is currently known. Our dissection of the *BACH2* locus, for instance, implicates *MDN1* as the likely causal gene. *MDN1* encodes

midasin AAA ATPase 1, a nuclear chaperone required for maturation and export of pre-60S ribosome units. It is widely expressed in the immune and hematopoietic systems and elsewhere. Homozygous knockout mice do not



**Table 2. Regulatory Fine-Mapping Indicates Risk Variants for Multiple Diseases in the Same Loci Affect the Same Genes**

|                                              | Concordance | Discordance | Jaccard Coefficient | Disease Overlap (Fisher's Exact p) |
|----------------------------------------------|-------------|-------------|---------------------|------------------------------------|
| Number of most associated SNPs               | 9           | 86          | 0.09                | – (p = NA)                         |
| Number of CI SNPs (mean)                     | 9.26        | 41.14       | 0.2                 | 2.15 (p = 0.0134)                  |
| Number of prioritized CI SNPs (mean)         | 2.67        | 11.37       | 0.23                | 2.25 (p = 0.0104)                  |
| Number of prioritized replicable DHSs (mean) | 2.62        | 9.84        | 0.24                | 2.54 (p = 0.0031)                  |
| Number of prioritized genes (mean)           | 1.29        | 2.32        | 0.46                | 5.27 (p = 5 × 10 <sup>−6</sup> )   |

In loci harboring associations to multiple diseases, we find that the most associated variants are often different (top row). However, the credible interval sets in these loci overlap significantly (hypergeometric  $p < 0.001$ , second row), and this overlap is greater than that of the most associated variants alone (Fisher's exact test  $p$  shown in the last column). This overlap is also true when comparing the subset of CI SNPs on DHSs and for the number of DHSs harboring a CI SNP across diseases (third and fourth rows). When we compare prioritized genes, we see further increase in overlap relative to most associated variants *and* to prioritized DHSs (bottom row, Fisher's exact test  $p = 5 \times 10^{-6}$  and  $p = 4.9 \times 10^{-4}$ , respectively). Thus, identifying risk-mediating genes partially overcomes the limited resolution of analyses only focusing on genetic association data.

survive, but heterozygote animals have not been screened for immune-relevant phenotypes.<sup>48</sup> Variation at the *MDN1* locus across inbred mouse strains is associated with total lymphocyte count, CD4<sup>+</sup> T cell viability in response to doxycycline E, and CD4<sup>+</sup> T cell levels as a proportion of total lymphocyte count, suggesting an overall effect on CD4<sup>+</sup> T cell viability.<sup>49,50</sup> In humans, the gene is highly intolerant to mutation<sup>51</sup> and particularly to loss-of-function mutations,<sup>52</sup> suggesting a fundamental role. We therefore suggest that *MDN1* may drive pathogenesis by altering CD4<sup>+</sup> T cell homeostasis and viability in adults. We note that, despite the experimental evidence supporting this role, this gene has not yet received significant consideration in human disease studies, highlighting the importance of unbiased, data-driven approaches in gene prioritization.

Another gene we prioritize, *IL19*, encodes the anti-inflammatory cytokine interleukin 19, a member of the IL10 family. IL19 activates STAT3 signaling in monocytes and through this drives the production of IL6 and TNF $\alpha$  to induce apoptosis in T cells. Decreased IL19 expression exacerbates disease in murine experimental colitis, a model for human IBD where pathology is driven by T helper cell-mediated immune responses,<sup>53,54</sup> and *IL19* is overexpressed in IBD-affected individuals with active disease.<sup>55</sup> Thus, *IL19* appears to mediate pathogenesis by decreasing innate immune dampening of adaptive responses and is of significant therapeutic interest.<sup>56</sup>

In the majority of the 53 loci in which we are able to resolve to a gene, we do not prioritize the gene closest to the maximally associated marker. This suggests that risk-mediating regulatory elements act at considerable distances, either by influencing the overall transcriptional landscape of the region or by acting on individual genes at a distance.<sup>57</sup> These competing explanations make different predictions: the former implies that many genes will be controlled by the risk-mediating regulator, whereas the latter predicts a limited number of targets. As we find only a single significant gene in the majority of cases, our results support the latter scenario, where risk is medi-

ated by changes to specific gene regulatory programs affecting particular genes.

More broadly, the observation that most common, complex disease risk aggregates in gene regulatory regions<sup>4,7,9</sup> has made the translation of genetic association results into molecular and cellular mechanisms challenging. Fine-mapping is limited in resolution by linkage disequilibrium, making association data alone insufficient to identify a causal variant driving risk in a locus. For example, in a recent Immunochip study of multiple sclerosis,<sup>14</sup> we were able to reduce 14/66 (21%) Immunochip regions to 90% credible interval sets of fewer than 15 variants, and 5/66 to fewer than 5 variants, though increases in sample size will raise the resolution of these approaches.<sup>15</sup> These fine-mapping strategies assume that a single causal variant drives risk in the locus, which conditional analyses in both the MS and IBD data suggest holds true.<sup>14,15</sup> Unlike coding variants, inferring function of non-coding polymorphisms remains challenging, though efforts to integrate functional genomics and population genetics data into composite functional scores<sup>58,59</sup> or integrating genetic and epigenetic data<sup>11</sup> are gaining some traction on this problem. Our own work complements these efforts by focusing on identifying individual regulators and the genes they control to generate testable hypotheses of the molecular basis of disease mechanism.

### Supplemental Data

Supplemental Data include 19 figures and 4 tables and can be found with this article online at <http://dx.doi.org/10.1016/j.ajhg.2017.06.001>.

### Acknowledgments

C.C. and P.S. were partly supported by a shared research agreement with Biogen, which had no role in designing or interpreting this study. We are grateful to the International Multiple Sclerosis Genetics Consortium and the International Inflammatory Bowel Disease Genetics Consortium, and specifically to Mark Daly and Stephan Ripke, for access to GWAS summary statistics from their

respective meta-analyses. We are also grateful to Benjamin Neale and Hillary Finucane for assistance with heritability calculations, and to Sung Chun for assistance with simulations.

Received: January 20, 2017

Accepted: May 31, 2017

Published: July 6, 2017

## Web Resources

Immunobase, <https://www.immunobase.org/>

Regfm, <https://github.com/cotsapaslab/regfm>

Roadmap chromatin accessibility data, [https://www.genboree.org/EdaccData/Current-Release/experiment-sample/Chromatin\\_Accessibility/](https://www.genboree.org/EdaccData/Current-Release/experiment-sample/Chromatin_Accessibility/)

Roadmap exon array data, [http://www.genboree.org/EdaccData/Current-Release/experiment-sample/Expression\\_Array/](http://www.genboree.org/EdaccData/Current-Release/experiment-sample/Expression_Array/)

## References

- Zhernakova, A., van Diemen, C.C., and Wijmenga, C. (2009). Detecting shared pathogenesis from the shared genetics of immune-related diseases. *Nat. Rev. Genet.* *10*, 43–55.
- Zenewicz, L.A., Abraham, C., Flavell, R.A., and Cho, J.H. (2010). Unraveling the genetics of autoimmunity. *Cell* *140*, 791–797.
- Trynka, G., Sandor, C., Han, B., Xu, H., Stranger, B.E., Liu, X.S., and Raychaudhuri, S. (2013). Chromatin marks identify critical cell types for fine mapping complex trait variants. *Nat. Genet.* *45*, 124–130.
- Maurano, M.T., Humbert, R., Rynes, E., Thurman, R.E., Haugen, E., Wang, H., Reynolds, A.P., Sandstrom, R., Qu, H., Brody, J., et al. (2012). Systematic localization of common disease-associated variation in regulatory DNA. *Science* *337*, 1190–1195.
- Karczewski, K.J., Dudley, J.T., Kukurba, K.R., Chen, R., Butte, A.J., Montgomery, S.B., and Snyder, M. (2013). Systematic functional regulatory assessment of disease-associated variants. *Proc. Natl. Acad. Sci. USA* *110*, 9607–9612.
- Corradin, O., Saiakhova, A., Akhtar-Zaidi, B., Myeroff, L., Willis, J., Cowper-Salari, R., Lupien, M., Markowitz, S., and Scaheri, P.C. (2014). Combinatorial effects of multiple enhancer variants in linkage disequilibrium dictate levels of gene expression to confer susceptibility to common traits. *Genome Res.* *24*, 1–13.
- Farh, K.K., Marson, A., Zhu, J., Kleinewietfeld, M., Housley, W.J., Beik, S., Shores, N., Whitton, H., Ryan, R.J., Shishkin, A.A., et al. (2015). Genetic and epigenetic fine mapping of causal autoimmune disease variants. *Nature* *518*, 337–343.
- Finucane, H.K., Bulik-Sullivan, B., Gusev, A., Trynka, G., Reshef, Y., Loh, P.R., Anttila, V., Xu, H., Zang, C., Farh, K., et al.; ReproGen Consortium; Schizophrenia Working Group of the Psychiatric Genomics Consortium; and RACI Consortium (2015). Partitioning heritability by functional annotation using genome-wide association summary statistics. *Nat. Genet.* *47*, 1228–1235.
- Gusev, A., Lee, S.H., Trynka, G., Finucane, H., Vilhjálmsson, B.J., Xu, H., Zang, C., Ripke, S., Bulik-Sullivan, B., Stahl, E., et al.; Schizophrenia Working Group of the Psychiatric Genomics Consortium; SWE-SCZ Consortium; Schizophrenia Working Group of the Psychiatric Genomics Consortium; and SWE-SCZ Consortium (2014). Partitioning heritability of regulatory and cell-type-specific variants across 11 common diseases. *Am. J. Hum. Genet.* *95*, 535–552.
- Liu, J.Z., Almarri, M.A., Gaffney, D.J., Mells, G.F., Jostins, L., Cordell, H.J., Ducker, S.J., Day, D.B., Heneghan, M.A., Neuberger, J.M., et al.; UK Primary Biliary Cirrhosis (PBC) Consortium; and Wellcome Trust Case Control Consortium 3 (2012). Dense fine-mapping study identifies new susceptibility loci for primary biliary cirrhosis. *Nat. Genet.* *44*, 1137–1141.
- Kichaev, G., and Pasaniuc, B. (2015). Leveraging functional-annotation data in trans-ethnic fine-mapping studies. *Am. J. Hum. Genet.* *97*, 260–271.
- Schaub, M.A., Boyle, A.P., Kundaje, A., Batzoglou, S., and Snyder, M. (2012). Linking disease associations with regulatory information in the human genome. *Genome Res.* *22*, 1748–1759.
- Maller, J.B., McVean, G., Byrnes, J., Vukcevic, D., Palin, K., Su, Z., Howson, J.M., Auton, A., Myers, S., Morris, A., et al.; Wellcome Trust Case Control Consortium (2012). Bayesian refinement of association signals for 14 loci in 3 common diseases. *Nat. Genet.* *44*, 1294–1301.
- Beecham, A.H., Patsopoulos, N.A., Xifara, D.K., Davis, M.F., Kempainen, A., Cotsapas, C., Shah, T.S., Spencer, C., Booth, D., Goris, A., et al.; International Multiple Sclerosis Genetics Consortium (IMSGC); Wellcome Trust Case Control Consortium 2 (WTCCC2); and International IBD Genetics Consortium (IBDGC) (2013). Analysis of immune-related loci identifies 48 new susceptibility variants for multiple sclerosis. *Nat. Genet.* *45*, 1353–1360.
- Huang, H., Fang, M., Jostins, L., Mirkov, M.U., Boucher, G., Anderson, C.A., Andersen, V., Cleyne, I., Cortes, A., Crins, E., et al. (2015). Association mapping of inflammatory bowel disease loci to single variant resolution. *bioRxiv*. <http://dx.doi.org/10.1101/028688>.
- Sheffield, N.C., Thurman, R.E., Song, L., Safi, A., Stamatoyannopoulos, J.A., Lenhard, B., Crawford, G.E., and Furey, T.S. (2013). Patterns of regulatory activity across diverse human cell types predict tissue identity, transcription factor binding, and long-range interactions. *Genome Res.* *23*, 777–788.
- Thurman, R.E., Rynes, E., Humbert, R., Vierstra, J., Maurano, M.T., Haugen, E., Sheffield, N.C., Stergachis, A.B., Wang, H., Vernot, B., et al. (2012). The accessible chromatin landscape of the human genome. *Nature* *489*, 75–82.
- Bernstein, B.E., Stamatoyannopoulos, J.A., Costello, J.F., Ren, B., Milosavljevic, A., Meissner, A., Kellis, M., Marra, M.A., Beaudet, A.L., Ecker, J.R., et al. (2010). The NIH Roadmap Epigenomics Mapping Consortium. *Nat. Biotechnol.* *28*, 1045–1048.
- Kundaje, A., Meuleman, W., Ernst, J., Bilenky, M., Yen, A., Heravi-Moussavi, A., Kheradpour, P., Zhang, Z., Wang, J., Ziller, M.J., et al.; Roadmap Epigenomics Consortium (2015). Integrative analysis of 111 reference human epigenomes. *Nature* *518*, 317–330.
- John, S., Sabo, P.J., Thurman, R.E., Sung, M.H., Biddie, S.C., Johnson, T.A., Hager, G.L., and Stamatoyannopoulos, J.A. (2011). Chromatin accessibility pre-determines glucocorticoid receptor binding patterns. *Nat. Genet.* *43*, 264–268.
- Enright, A.J., Van Dongen, S., and Ouzounis, C.A. (2002). An efficient algorithm for large-scale detection of protein families. *Nucleic Acids Res.* *30*, 1575–1584.

22. Patsopoulos, N.A., Esposito, F., Reischl, J., Lehr, S., Bauer, D., Heubach, J., Sandbrink, R., Pohl, C., Edan, G., Kappos, L., et al.; Bayer Pharma MS Genetics Working Group; Steering Committees of Studies Evaluating IFN $\beta$ -1b and a CCR1-Antagonist; ANZgene Consortium; GeneMSA; and International Multiple Sclerosis Genetics Consortium (2011). Genome-wide meta-analysis identifies novel multiple sclerosis susceptibility loci. *Ann. Neurol.* *70*, 897–912.
23. Liu, J.Z., van Sommeren, S., Huang, H., Ng, S.C., Alberts, R., Takahashi, A., Ripke, S., Lee, J.C., Jostins, L., Shah, T., et al.; International Multiple Sclerosis Genetics Consortium; and International IBD Genetics Consortium (2015). Association analyses identify 38 susceptibility loci for inflammatory bowel disease and highlight shared genetic risk across populations. *Nat. Genet.* *47*, 979–986.
24. Cooper, J.D., Simmonds, M.J., Walker, N.M., Burren, O., Brand, O.J., Guo, H., Wallace, C., Stevens, H., Coleman, G., Franklyn, J.A., et al.; Wellcome Trust Case Control Consortium (2012). Seven newly identified loci for autoimmune thyroid disease. *Hum. Mol. Genet.* *21*, 5202–5208.
25. Trynka, G., Hunt, K.A., Bockett, N.A., Romanos, J., Mistry, V., Szperl, A., Bakker, S.F., Bardella, M.T., Bhaw-Rosun, L., Castillejo, G., et al.; Spanish Consortium on the Genetics of Coeliac Disease (CEGEC); PreventCD Study Group; and Wellcome Trust Case Control Consortium (WTCCC) (2011). Dense genotyping identifies and localizes multiple common and rare variant association signals in celiac disease. *Nat. Genet.* *43*, 1193–1201.
26. Jostins, L., Ripke, S., Weersma, R.K., Duerr, R.H., McGovern, D.P., Hui, K.Y., Lee, J.C., Schumm, L.P., Sharma, Y., Anderson, C.A., et al.; International IBD Genetics Consortium (IBDGC) (2012). Host-microbe interactions have shaped the genetic architecture of inflammatory bowel disease. *Nature* *491*, 119–124.
27. Hinks, A., Cobb, J., Marion, M.C., Prahalad, S., Sudman, M., Bowes, J., Martin, P., Comeau, M.E., Sajuthi, S., Andrews, R., et al.; Boston Children's JIA Registry; British Society of Paediatric and Adolescent Rheumatology (BSPAR) Study Group; Childhood Arthritis Prospective Study (CAPS); Childhood Arthritis Response to Medication Study (CHARMS); German Society for Pediatric Rheumatology (GKJR); JIA Gene Expression Study; NIAMS JIA Genetic Registry; TREAT Study; and United Kingdom Juvenile Idiopathic Arthritis Genetics Consortium (UKJIAGC) (2013). Dense genotyping of immune-related disease regions identifies 14 new susceptibility loci for juvenile idiopathic arthritis. *Nat. Genet.* *45*, 664–669.
28. Tsoi, L.C., Spain, S.L., Knight, J., Ellinghaus, E., Stuart, P.E., Capon, F., Ding, J., Li, Y., Tejasvi, T., Gudjonsson, J.E., et al.; Collaborative Association Study of Psoriasis (CASP); Genetic Analysis of Psoriasis Consortium; Psoriasis Association Genetics Extension; and Wellcome Trust Case Control Consortium 2 (2012). Identification of 15 new psoriasis susceptibility loci highlights the role of innate immunity. *Nat. Genet.* *44*, 1341–1348.
29. Okada, Y., Wu, D., Trynka, G., Raj, T., Terao, C., Ikari, K., Kochi, Y., Ohmura, K., Suzuki, A., Yoshida, S., et al.; RACI consortium; and GARNET consortium (2014). Genetics of rheumatoid arthritis contributes to biology and drug discovery. *Nature* *506*, 376–381.
30. Onengut-Gumuscu, S., Chen, W.M., Burren, O., Cooper, N.J., Quinlan, A.R., Mychaleckyj, J.C., Farber, E., Bonnie, J.K., Szpak, M., Schofield, E., et al.; Type 1 Diabetes Genetics Consortium (2015). Fine mapping of type 1 diabetes susceptibility loci and evidence for colocalization of causal variants with lymphoid gene enhancers. *Nat. Genet.* *47*, 381–386.
31. Cordell, H.J., Han, Y., Mells, G.F., Li, Y., Hirschfield, G.M., Greene, C.S., Xie, G., Juran, B.D., Zhu, D., Qian, D.C., et al.; Canadian-US PBC Consortium; Italian PBC Genetics Study Group; and UK-PBC Consortium (2015). International genome-wide meta-analysis identifies new primary biliary cirrhosis risk loci and targetable pathogenic pathways. *Nat. Commun.* *6*, 8019.
32. Abecasis, G.R., Altshuler, D., Auton, A., Brooks, L.D., Durbin, R.M., Gibbs, R.A., Hurles, M.E., McVean, G.A.; and 1000 Genomes Project Consortium (2010). A map of human genome variation from population-scale sequencing. *Nature* *467*, 1061–1073.
33. Benjamini, Y., and Hochberg, Y. (1995). Controlling the false discovery rate: a practical and powerful approach to multiple testing. *J. Royal Stat. Soc. B* *57*, 289–300.
34. Chun, S., Casparino, A., Patsopoulos, N.A., Croteau-Chonka, D.C., Raby, B.A., De Jager, P.L., Sunyaev, S.R., and Cotsapas, C. (2017). Limited statistical evidence for shared genetic effects of eQTLs and autoimmune-disease-associated loci in three major immune-cell types. *Nat. Genet.* *49*, 600–605.
35. Huber, W., Carey, V.J., Gentleman, R., Anders, S., Carlson, M., Carvalho, B.S., Bravo, H.C., Davis, S., Gatto, L., Girke, T., et al. (2015). Orchestrating high-throughput genomic analysis with Bioconductor. *Nat. Methods* *12*, 115–121.
36. Maurano, M.T., Haugen, E., Sandstrom, R., Vierstra, J., Shafer, A., Kaul, R., and Stamatoyannopoulos, J.A. (2015). Large-scale identification of sequence variants influencing human transcription factor occupancy in vivo. *Nat. Genet.* *47*, 1393–1401.
37. Ernst, J., and Kellis, M. (2012). ChromHMM: automating chromatin-state discovery and characterization. *Nat. Methods* *9*, 215–216.
38. Cortes, A., and Brown, M.A. (2011). Promise and pitfalls of the ImmunoChip. *Arthritis Res. Ther.* *13*, 101.
39. Parkes, M., Cortes, A., van Heel, D.A., and Brown, M.A. (2013). Genetic insights into common pathways and complex relationships among immune-mediated diseases. *Nat. Rev. Genet.* *14*, 661–673.
40. Moutsianas, L., Jostins, L., Beecham, A.H., Dilthey, A.T., Xifara, D.K., Ban, M., Shah, T.S., Patsopoulos, N.A., Alfredsson, L., Anderson, C.A., et al.; International IBD Genetics Consortium (IBDGC); and International Multiple Sclerosis Genetics Consortium (2015). Class II HLA interactions modulate genetic risk for multiple sclerosis. *Nat. Genet.* *47*, 1107–1113.
41. Trynka, G., Westra, H.J., Slowikowski, K., Hu, X., Xu, H., Stranger, B.E., Klein, R.J., Han, B., and Raychaudhuri, S. (2015). Disentangling the effects of colocalizing genomic annotations to functionally prioritize non-coding variants within complex-trait loci. *Am. J. Hum. Genet.* *97*, 139–152.
42. De Jager, P.L., Baecher-Allan, C., Maier, L.M., Arthur, A.T., Ottoboni, L., Barcellos, L., McCauley, J.L., Sawcer, S., Goris, A., Saarela, J., et al. (2009). The role of the CD58 locus in multiple sclerosis. *Proc. Natl. Acad. Sci. USA* *106*, 5264–5269.
43. Ellinghaus, D., Jostins, L., Spain, S.L., Cortes, A., Bethune, J., Han, B., Park, Y.R., Raychaudhuri, S., Pouget, J.G., Hübenal, M., et al.; International IBD Genetics Consortium (IBDGC); International Genetics of Ankylosing Spondylitis Consortium (IGAS); International PSC Study Group (IPSCSG); Genetic Analysis of Psoriasis Consortium (GAPC); and Psoriasis

- Association Genetics Extension (PAGE) (2016). Analysis of five chronic inflammatory diseases identifies 27 new associations and highlights disease-specific patterns at shared loci. *Nat. Genet.* *48*, 510–518.
44. Cotsapas, C., Voight, B.F., Rossin, E., Lage, K., Neale, B.M., Wallace, C., Abecasis, G.R., Barrett, J.C., Behrens, T., Cho, J., et al.; FOCIS Network of Consortia (2011). Pervasive sharing of genetic effects in autoimmune disease. *PLoS Genet.* *7*, e1002254.
  45. Bulik-Sullivan, B.K., Loh, P.R., Finucane, H.K., Ripke, S., Yang, J., Patterson, N., Daly, M.J., Price, A.L., Neale, B.M.; and Schizophrenia Working Group of the Psychiatric Genomics Consortium (2015). LD Score regression distinguishes confounding from polygenicity in genome-wide association studies. *Nat. Genet.* *47*, 291–295.
  46. Solovieff, N., Cotsapas, C., Lee, P.H., Purcell, S.M., and Smoller, J.W. (2013). Pleiotropy in complex traits: challenges and strategies. *Nat. Rev. Genet.* *14*, 483–495.
  47. Dendrou, C.A., Cortes, A., Shipman, L., Evans, H.G., Attfield, K.E., Jostins, L., Barber, T., Kaur, G., Kuttikkatte, S.B., Leach, O.A., et al. (2016). Resolving TYK2 locus genotype-to-phenotype differences in autoimmunity. *Sci. Transl. Med.* *8*, 363ra149.
  48. Skarnes, W.C., Rosen, B., West, A.P., Koutsourakis, M., Bushell, W., Iyer, V., Mujica, A.O., Thomas, M., Harrow, J., Cox, T., et al. (2011). A conditional knockout resource for the genome-wide study of mouse gene function. *Nature* *474*, 337–342.
  49. Petkova, S.B., Yuan, R., Tsaih, S.W., Schott, W., Roopenian, D.C., and Paigen, B. (2008). Genetic influence on immune phenotype revealed strain-specific variations in peripheral blood lineages. *Physiol. Genomics* *34*, 304–314.
  50. Frick, A., Fedoriw, Y., Richards, K., Damania, B., Parks, B., Suzuki, O., Benton, C.S., Chan, E., Thomas, R.S., and Wiltshire, T. (2015). Immune cell-based screening assay for response to anticancer agents: applications in pharmacogenomics. *Pharm. Genomics Pers. Med.* *8*, 81–98.
  51. Petrovski, S., Wang, Q., Heinzen, E.L., Allen, A.S., and Goldstein, D.B. (2013). Genic intolerance to functional variation and the interpretation of personal genomes. *PLoS Genet.* *9*, e1003709.
  52. Lek, M., Karczewski, K.J., Minikel, E.V., Samocha, K.E., Banks, E., Fennell, T., O'Donnell-Luria, A.H., Ware, J.S., Hill, A.J., Cummings, B.B., et al.; Exome Aggregation Consortium (2016). Analysis of protein-coding genetic variation in 60,706 humans. *Nature* *536*, 285–291.
  53. Matsuo, Y., Azuma, Y.T., Kuwamura, M., Kuramoto, N., Nishiyama, K., Yoshida, N., Ikeda, Y., Fujimoto, Y., Nakajima, H., and Takeuchi, T. (2015). Interleukin 19 reduces inflammation in chemically induced experimental colitis. *Int. Immunopharmacol.* *29*, 468–475.
  54. Azuma, Y.T., Matsuo, Y., Kuwamura, M., Yancopoulos, G.D., Valenzuela, D.M., Murphy, A.J., Nakajima, H., Karow, M., and Takeuchi, T. (2010). Interleukin-19 protects mice from innate-mediated colonic inflammation. *Inflamm. Bowel Dis.* *16*, 1017–1028.
  55. Fonseca-Camarillo, G., Furuzawa-Carballeda, J., Granados, J., and Yamamoto-Furusho, J.K. (2014). Expression of interleukin (IL)-19 and IL-24 in inflammatory bowel disease patients: a cross-sectional study. *Clin. Exp. Immunol.* *177*, 64–75.
  56. Azuma, Y.T., Nakajima, H., and Takeuchi, T. (2011). IL-19 as a potential therapeutic in autoimmune and inflammatory diseases. *Curr. Pharm. Des.* *17*, 3776–3780.
  57. Davison, L.J., Wallace, C., Cooper, J.D., Cope, N.F., Wilson, N.K., Smyth, D.J., Howson, J.M., Saleh, N., Al-Jeffery, A., Angus, K.L., et al.; Cardiogenics Consortium (2012). Long-range DNA looping and gene expression analyses identify DEXI as an autoimmune disease candidate gene. *Hum. Mol. Genet.* *21*, 322–333.
  58. Kircher, M., Witten, D.M., Jain, P., O'Roak, B.J., Cooper, G.M., and Shendure, J. (2014). A general framework for estimating the relative pathogenicity of human genetic variants. *Nat. Genet.* *46*, 310–315.
  59. Petrovski, S., Gussow, A.B., Wang, Q., Halvorsen, M., Han, Y., Weir, W.H., Allen, A.S., and Goldstein, D.B. (2015). The intolerance of regulatory sequence to genetic variation predicts gene dosage sensitivity. *PLoS Genet.* *11*, e1005492.

**The American Journal of Human Genetics, Volume 101**

**Supplemental Data**

**Integrative Genetic and Epigenetic Analysis  
Uncovers Regulatory Mechanisms  
of Autoimmune Disease**

**Parisa Shooshtari, Hailiang Huang, and Chris Cotsapas**

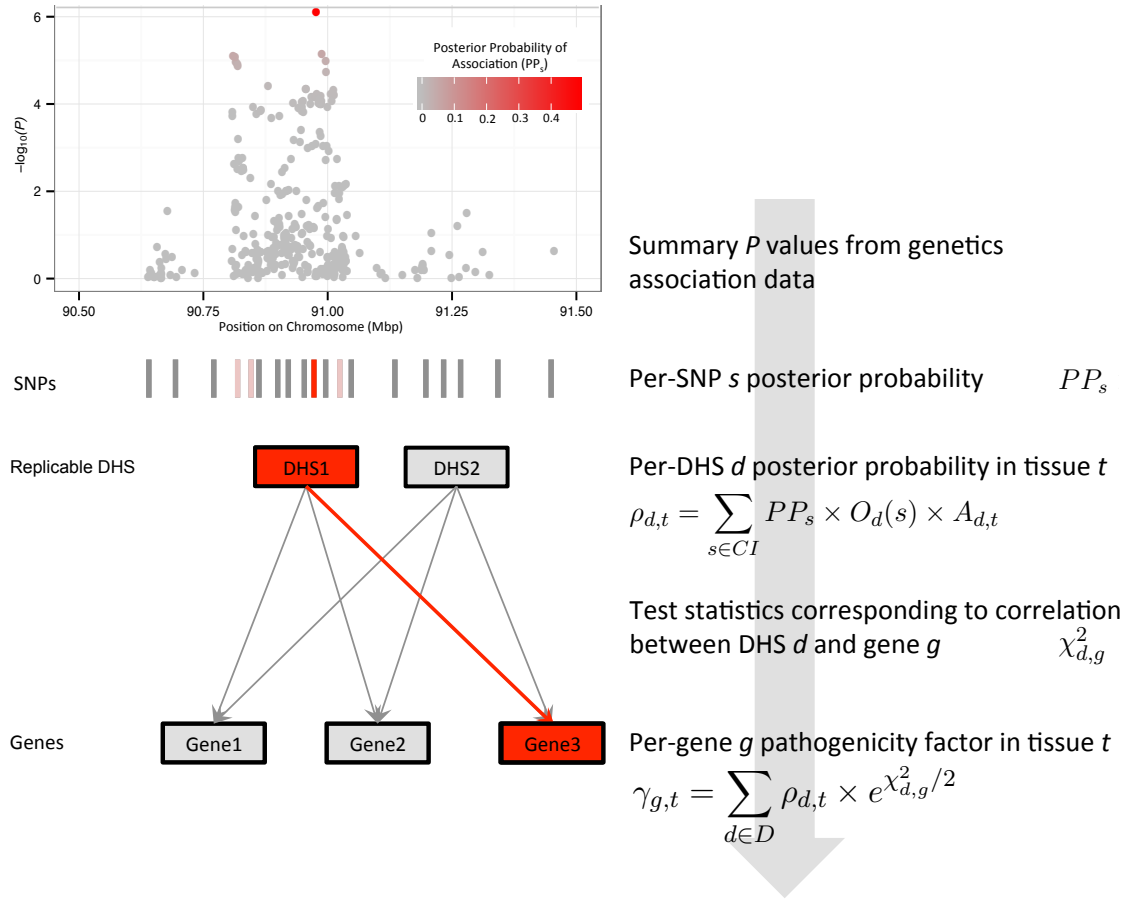

**Figure S1: Overview of our regulatory fine-mapping approach.** We begin with disease association summary statistics, then identify the credible interval (CI) set of SNPs and calculate posterior probabilities of association for each variant in the set. We then overlap these variants with DNase I Hypersensitive sites (DHS), and calculate the regulatory potential  $\rho$  as the proportion of posterior probability on each DHS. The sum of  $\rho$  across all DHS in a locus captures how likely the association is to be mediated by regulatory variation. We assess the significance of  $\rho$  in each tissue empirically, by randomizing the positions of each active DHS in the locus and recomputing. We use the  $\chi^2$  value derived from the correlation between DHS accessibility and nearby gene expression after correction for data structure, to calculate  $\gamma$ , the pathogenicity factor for each gene in the locus. We again calculate the significance of  $\gamma$  empirically, by randomly resampling values from the matrix of DHS–gene  $\chi^2$  correlation statistics.

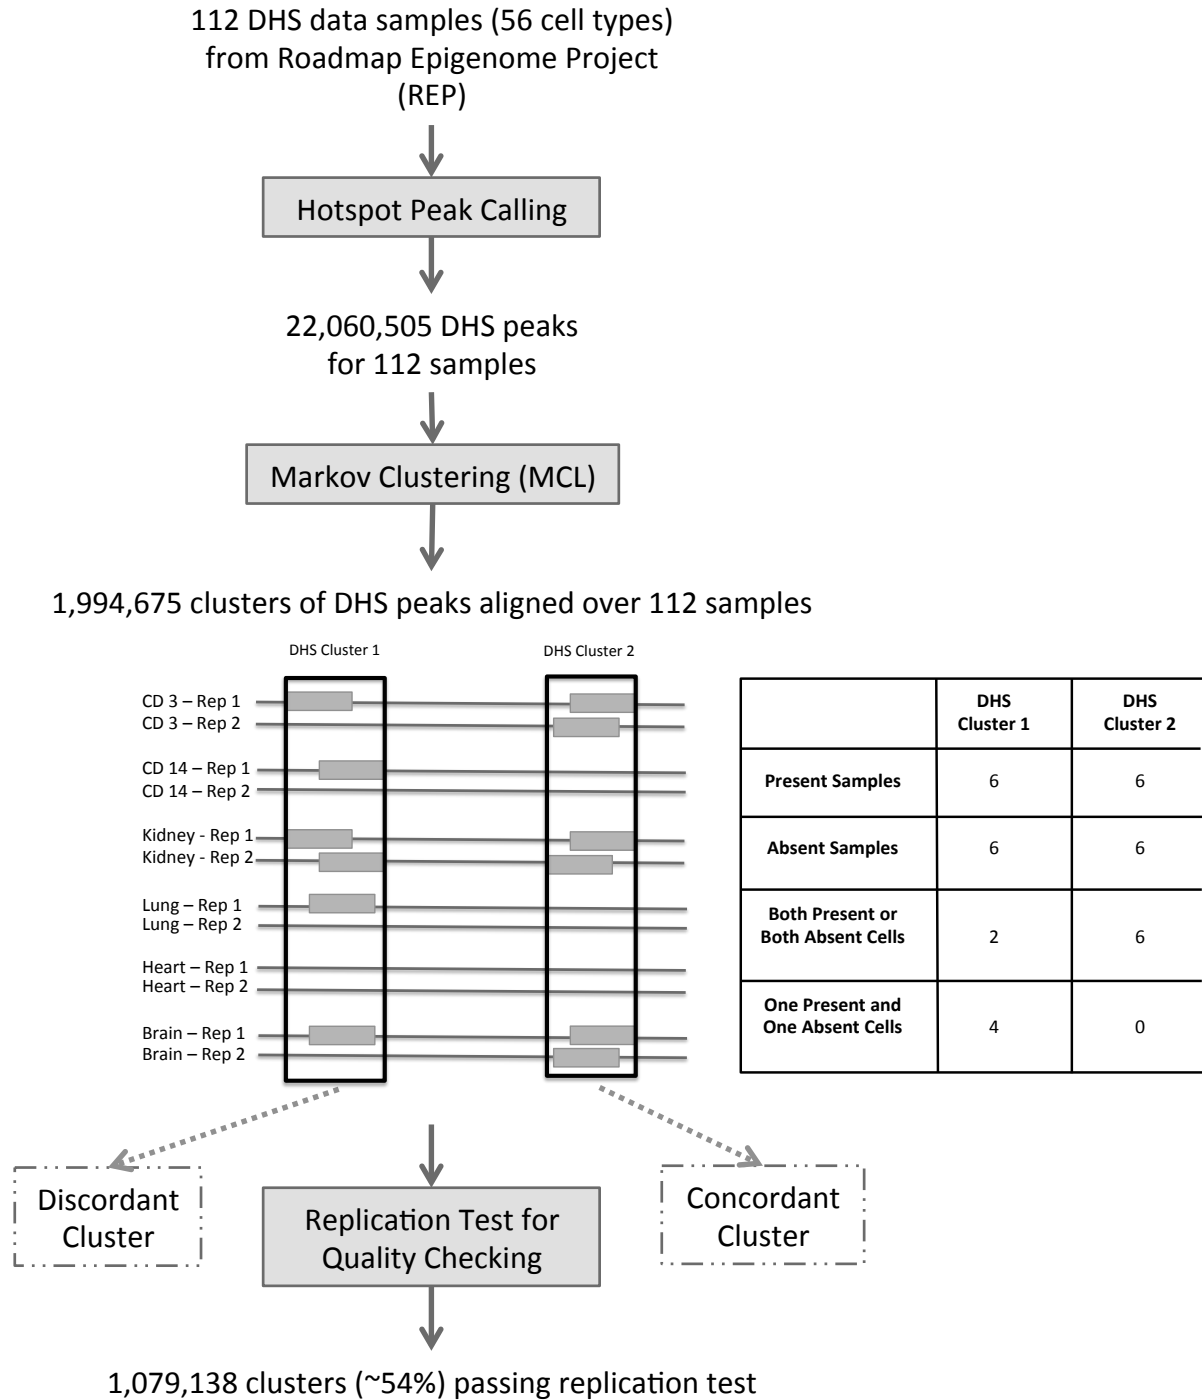

**Figure S2: Overview of our DHS clustering and QC pipeline.** Our approach requires correlating gene expression to DHS accessibility across tissues. We therefore identify DHS peaks in each tissue corresponding to the same underlying regulatory region with Markov Clustering. To confirm the validity of these clusters, we perform a statistical replication test using replicate samples of the 56 Roadmap Epigenomics Project tissues as described in the Methods. We find that 54% of clusters show nominal evidence of replication (chi-squared  $p < 0.05$ ).

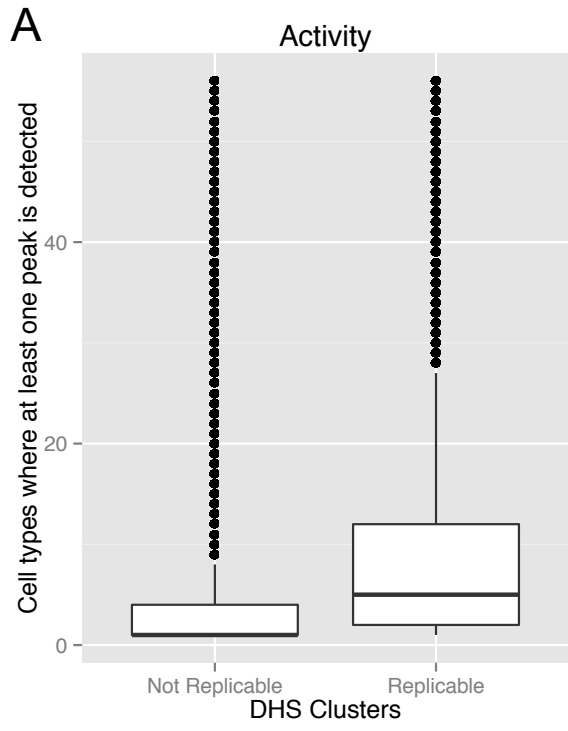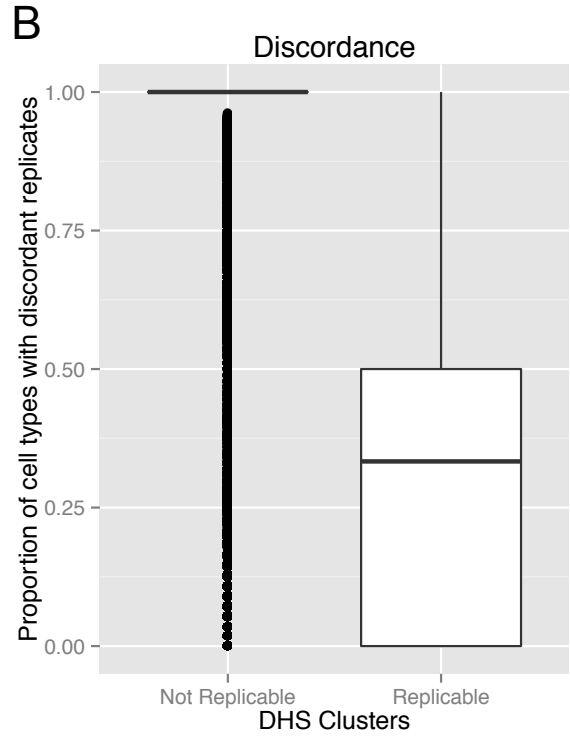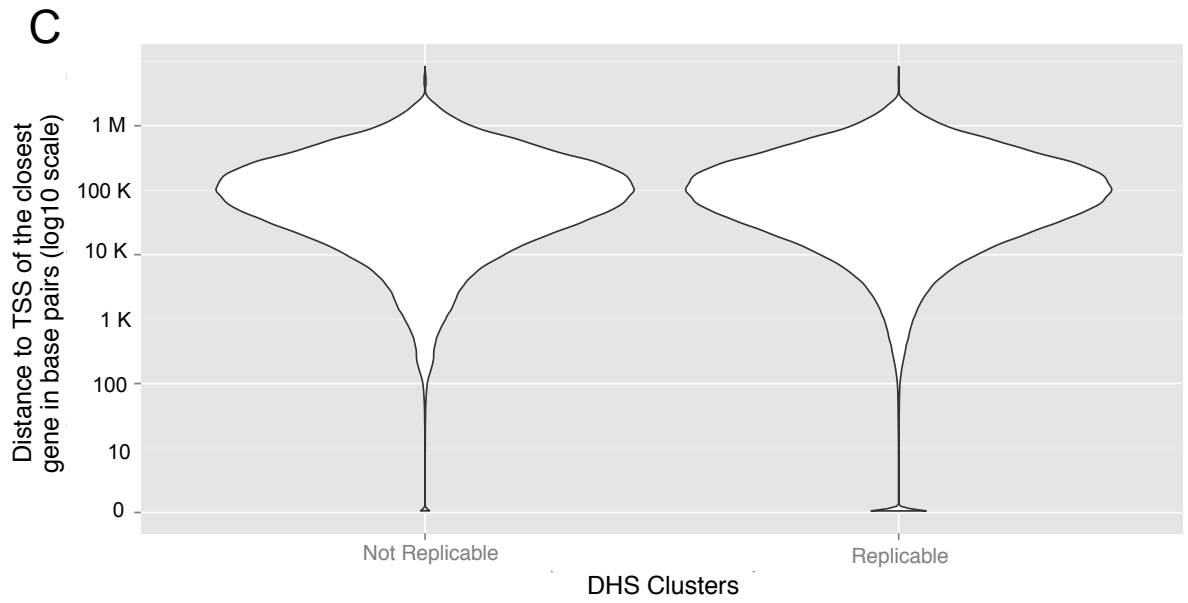



**Figure S3: Characteristics of replicable and non-replicable DHS clusters.** We clustered DHS peaks across two replicates in each of 56 REMC cell types, and applied a statistical test to determine which of these clusters show significant concordance across replicates (peaks seen in both or neither replicate, indicating an active or inactive state, respectively). We find that the 1,079,138/1,994,675 (54.1%) of clusters showing evidence of replication ( $p < 0.05$ ) have different properties from the remaining clusters. (A) Replicable DHS are detected in more cell types. (B) Replicable DHS clusters show greater concordance between technical replicates, and we detect a DHS peak within the boundaries of the cluster in both replicates for 65% of active cell types. Non-replicable clusters only show evidence of activity in one technical replicate of a cell type the vast majority of the time. (C) Replicable and non-replicable DHS clusters are similarly positioned relative to the closest transcriptional start site (TSS). Promoter elements (those  $< 100$  bp from a TSS) tend to replicate, as shown by the second mode near zero in the right-hand distribution.

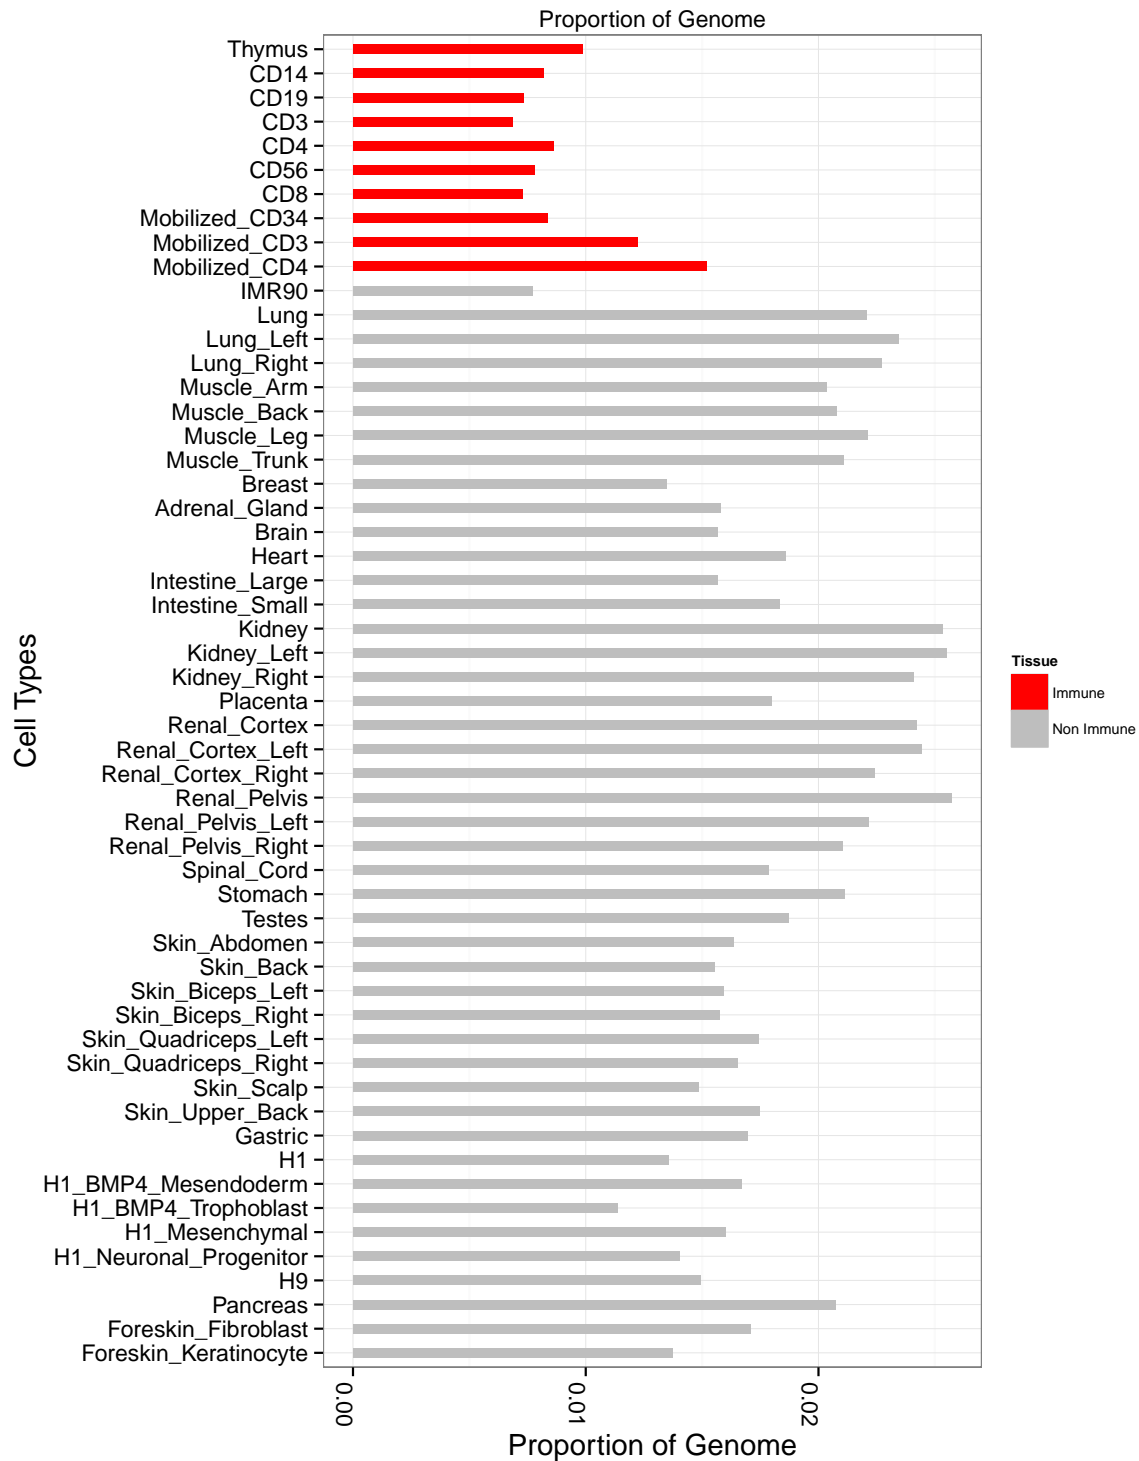

**Figure S4: Proportion of the autosomal genome covered by replicable DHS clusters active in each Roadmap Epigenomics Project tissue.** We define each of the 1,079,138 replicable DHS clusters as accessible in each tissue if we observe at least one DHS peak within its boundaries in one of the replicate samples in the underlying Roadmap data. We find that these clusters occupy 1.5–2.5% of the autosomal genome overall, and that clusters active in immune cell subpopulations (red) occupy a relatively small portion of the genome, around 1%.

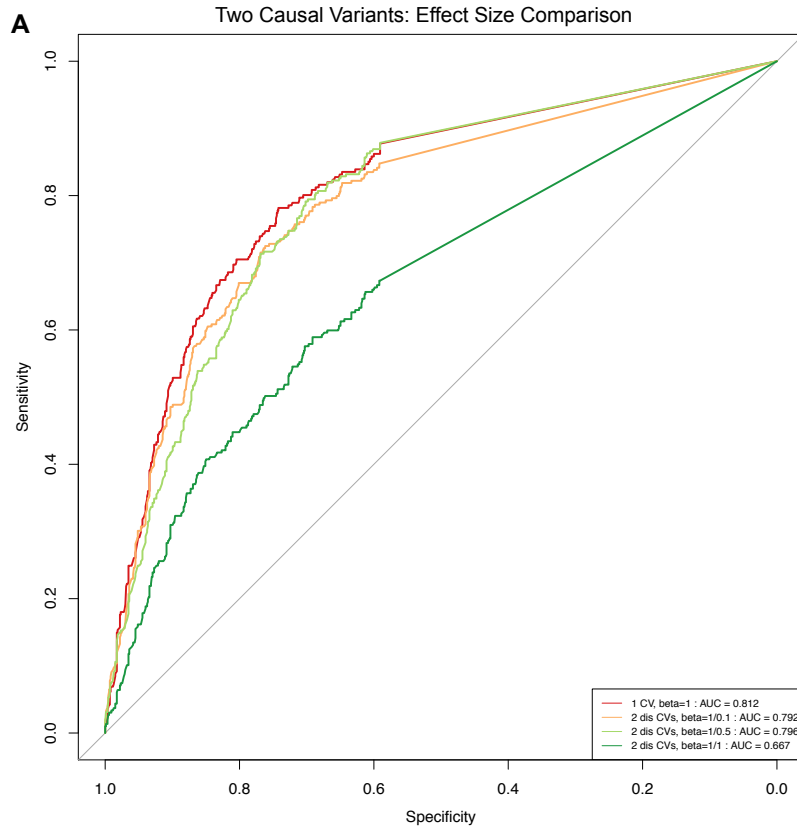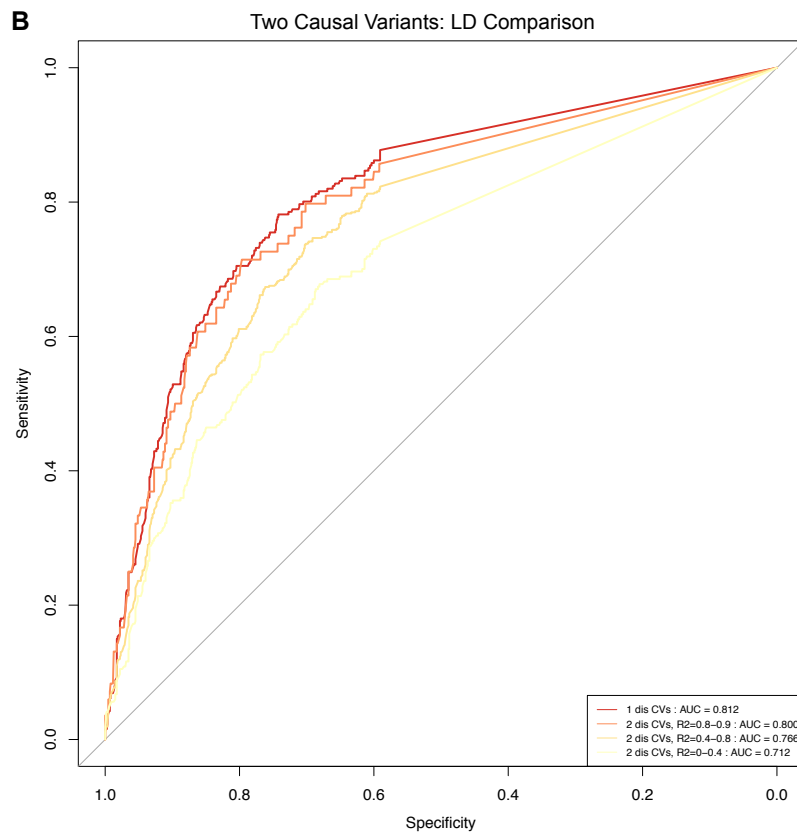

**Figure S5: Statistical power and multiple independent associations in a locus.** To assess the statistical power of our framework, we performed a series of simulations where we specified either one or two causal variants in a locus (as previously described in Chun *et. al.*<sup>36</sup>). We randomly selected one REMC cell type, fetal kidney, from which to draw DHS cluster data for these simulations. We performed positive simulations where the causal variant is on a DHS cluster, and negative simulations where it is not. For two variants, we performed positive simulations where the first causal variant is on a DHS cluster and the second is not, and negative simulations where neither is on a DHS cluster. We also varied the strength of the second variant's effect size relative to the first (shown in panel A), and the linkage disequilibrium between the two variants (shown in panel B), to establish how these parameters affect our ability to assess regulatory potential. (A) The single-variant simulations show our method is well-powered (AUC = 0.812, red line). It remains so when a second, weaker causal variant that is not on a DHS is introduced (yellow, light green), until the effect size of the second effect becomes equal to that of the primary causal variant (dark green). (B) When the two independent variants are in high LD, our power to detect regulatory potential remains high (orange and dark yellow) relative to the single-variant scenario. This is because the credible intervals due to the two causal variants would largely overlap and thus the combined data signal identifies the majority of the same variants. As LD reduces, our power diminishes as the combined association test statistics begin to become noisier, making the credible interval identification less accurate.

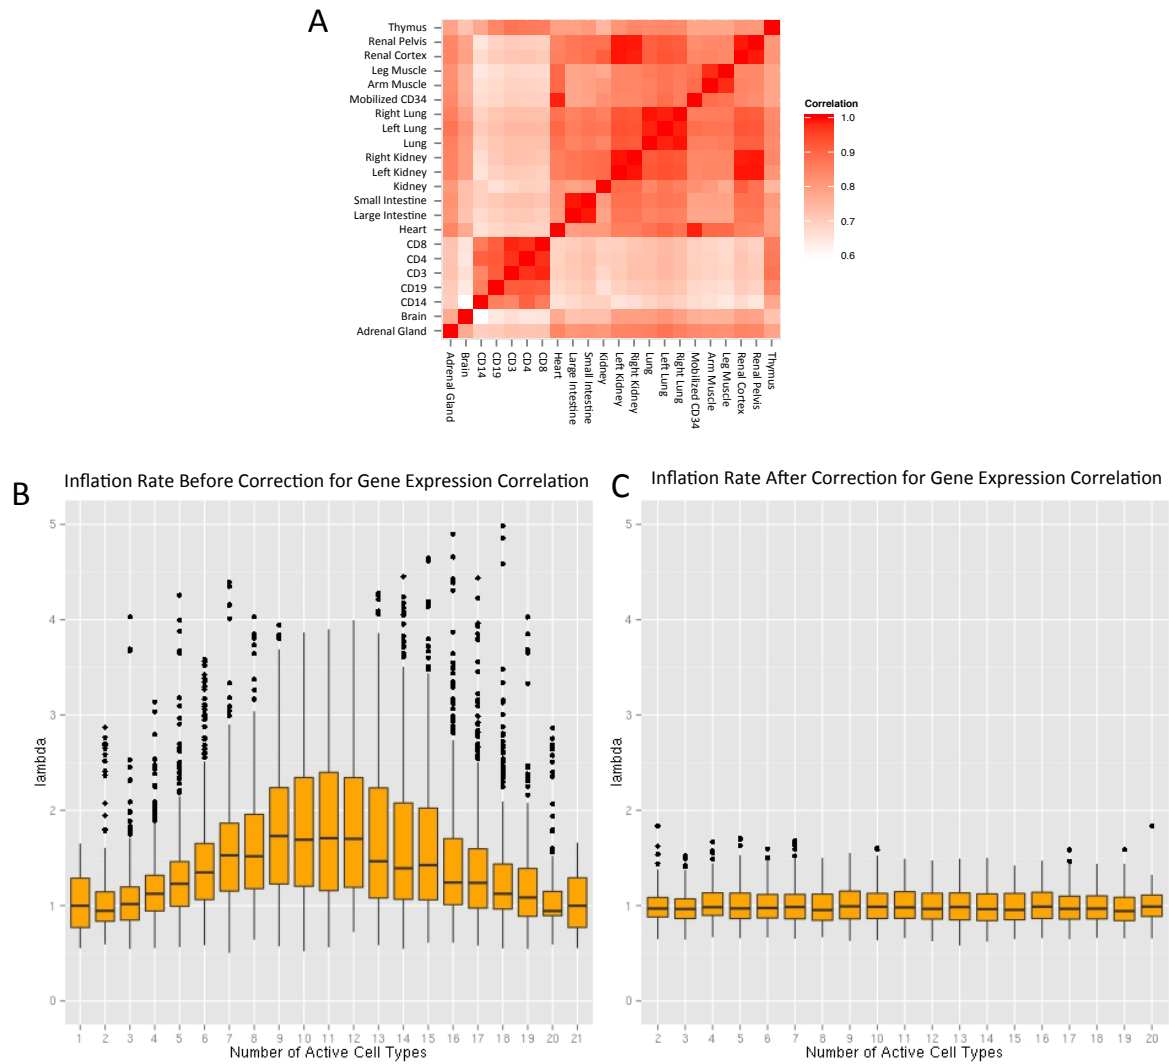

**Figure S6: Adjusting for the correlation structure in gene expression data.** (A) There is correlation between gene expressions of different cell types from relevant tissues. (B) This causes inflation in the P value of correlation between a DHS and the genes. (C) By adjusting for the correlation structure of gene expression data, we substantially reduced this inflation.

A

### ALL AID Loci

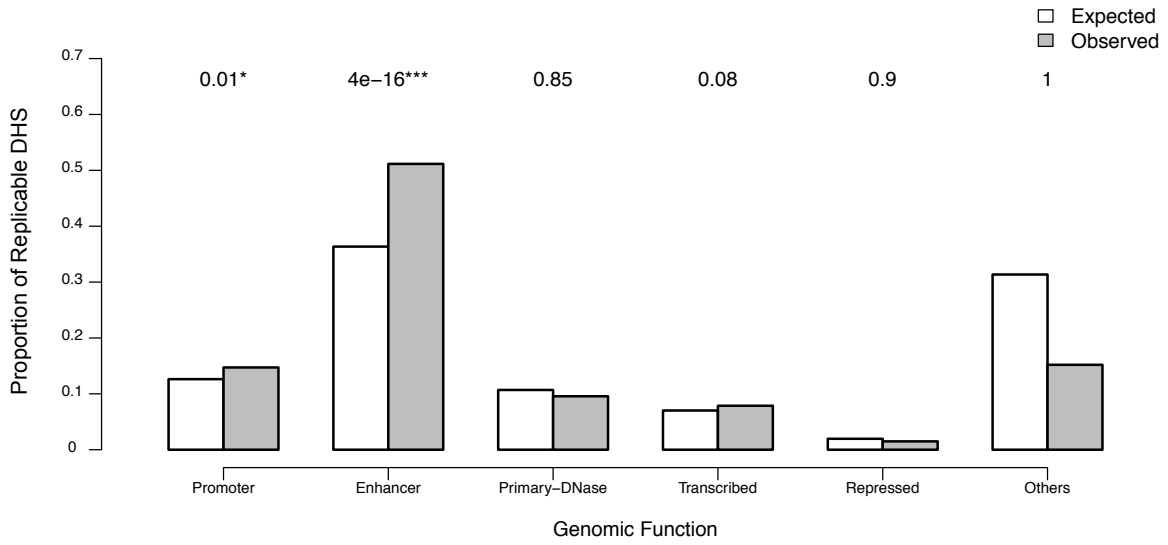

B

### Loci with Significant Regulatory Potential

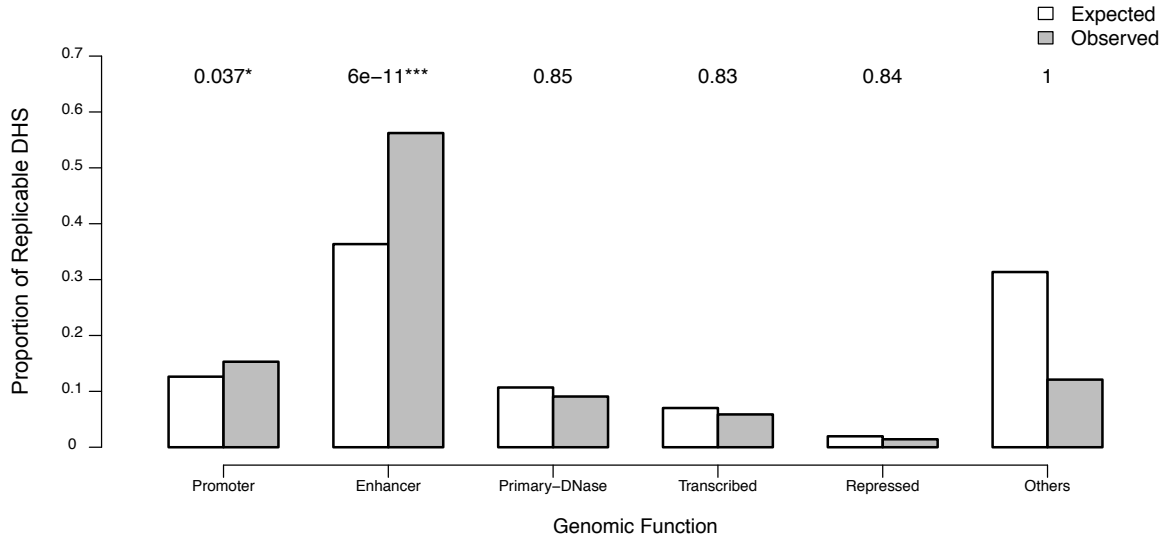

C

### Loci with No Significant Evidence for Regulatory Potential

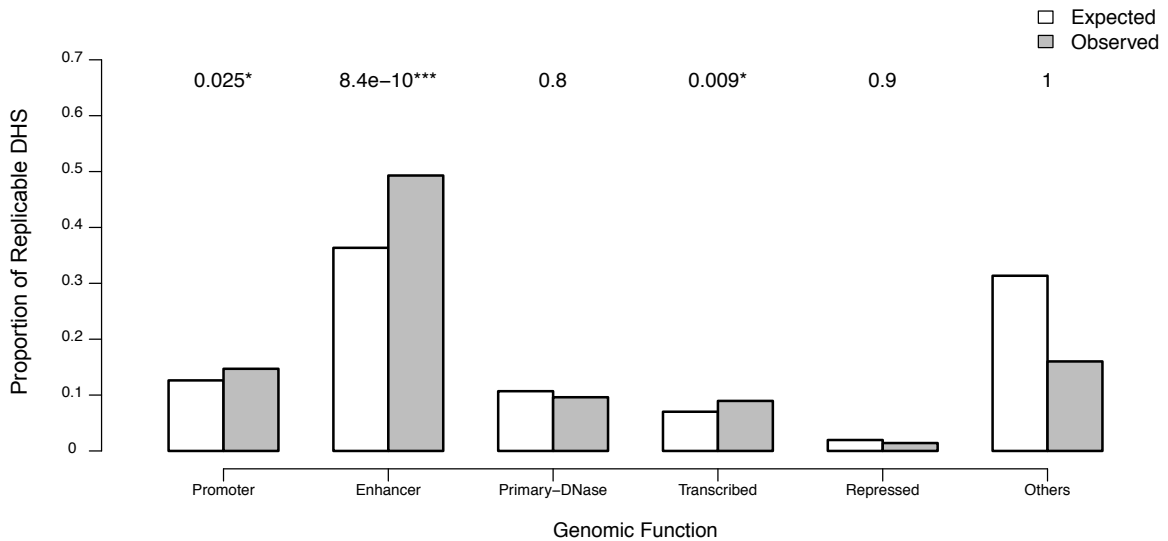

**Figure S7: Functional annotation of replicable DHS harboring credible interval SNPs across 301 autoimmune and inflammatory risk loci.** By overlapping these replicable DHS with ChromHMM data, we find they are significantly enriched for active enhancer ( $P = 4e - 16$ ) and promoter annotation ( $P = 0.01$ , not significant after Bonferroni correction for number of annotations tested, panel A). We observe this enrichment both in the loci with significant regulatory potential and those with no significant evidence of risk on replicable DHS (panels B and C respectively).

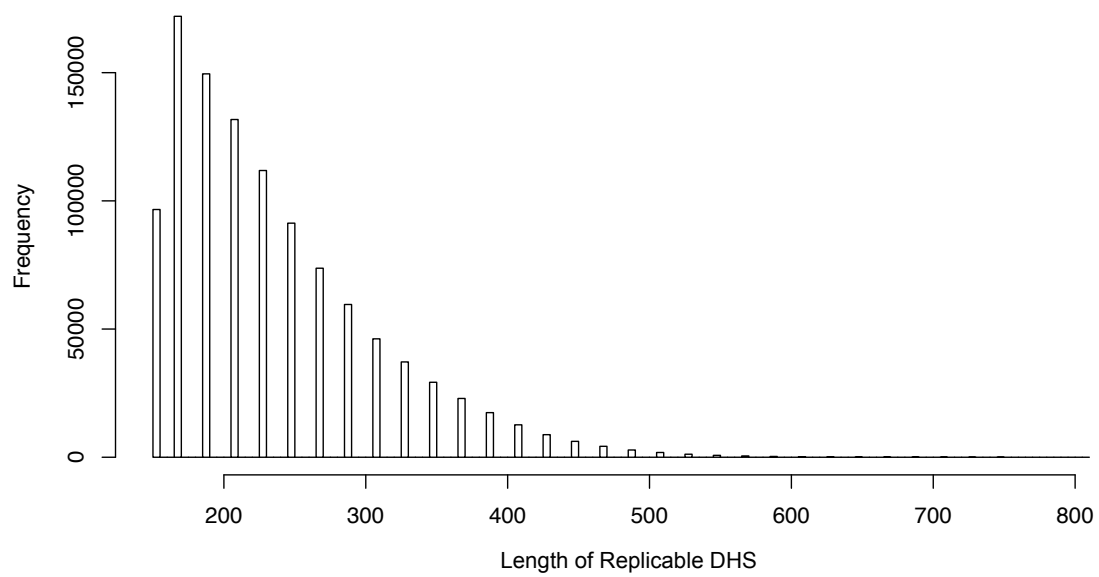

**Figure S8: Replicable DHS size distribution.** In 56 REP tissues with at least two replicate DHS sequencing runs, we called 22,060,505 narrow-sense 150bp peaks at a false discovery rate  $FDR < 1\%$ . We assembled these peaks into 1,994,675 DHS clusters using Markov clustering. Of these, 1,079,138 (54.1%) covering 8.5% of the genome passed nominal significance in a statistical replication test across the 56 pairs of samples ( $\chi^2_1$  test,  $p < 0.05$ ). Shown here is the size distribution of the DHS clusters passing the replication test.



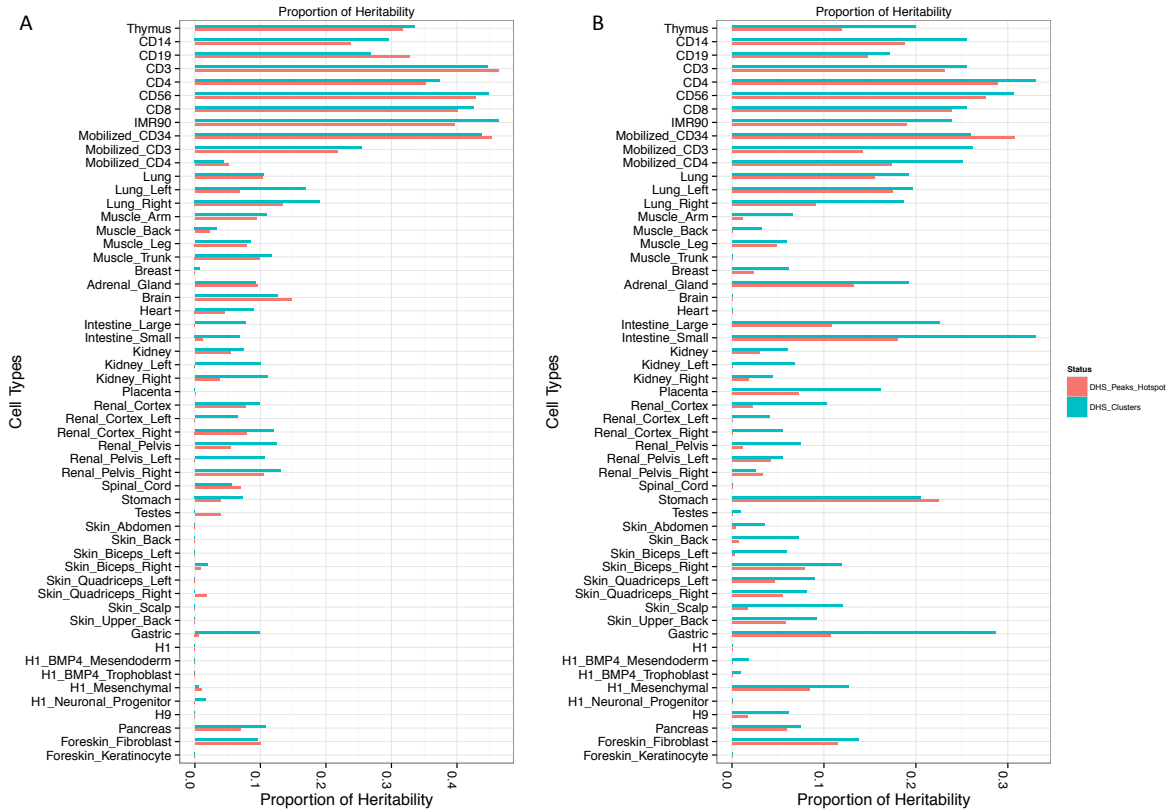

**Figure S9: Proportion of heritability explained by replicable DHS.** Of our DHS clusters, only 1,079,138/1,994,675 (54.1%) pass our statistical replication threshold. We reasoned that if our clustering was poorly calibrated or our statistical replication statistic underpowered, we would only capture about half the useful information across called DHS peaks. To evaluate this hypothesis, we asked if the 1,079,138 DHS clusters passing these filters explain a substantial amount of disease heritability ( $h^2g$ ). We used the partitioning heritability approach<sup>6</sup> to compute the proportion of disease heritability attributable in each REP tissue to (i) all DHS peaks called by Hotspot across the two sample replicates; and (ii) the subset of the 1,079,138 replicable DHS active in that tissue. As we called replicable DHS genome-wide and heritability estimates are also made genome-wide<sup>6</sup>, we used publicly-available summary statistics from multiple sclerosis<sup>22</sup> (left) and inflammatory bowel disease<sup>23</sup> (right) for these analyses, rather than analyze ImmunoChip loci alone. We found that the 14.8% of the autosomal genome covered by all DHS peaks and the 8.5% covered by our replicable DHS explained effectively the same heritability, indicating our approach identifies most DHS relevant to disease pathogenesis. We note that differences between the heritability estimates are not significant and lie within the standard error of the estimates.

**Number of Active Replicable DHS per Locus**

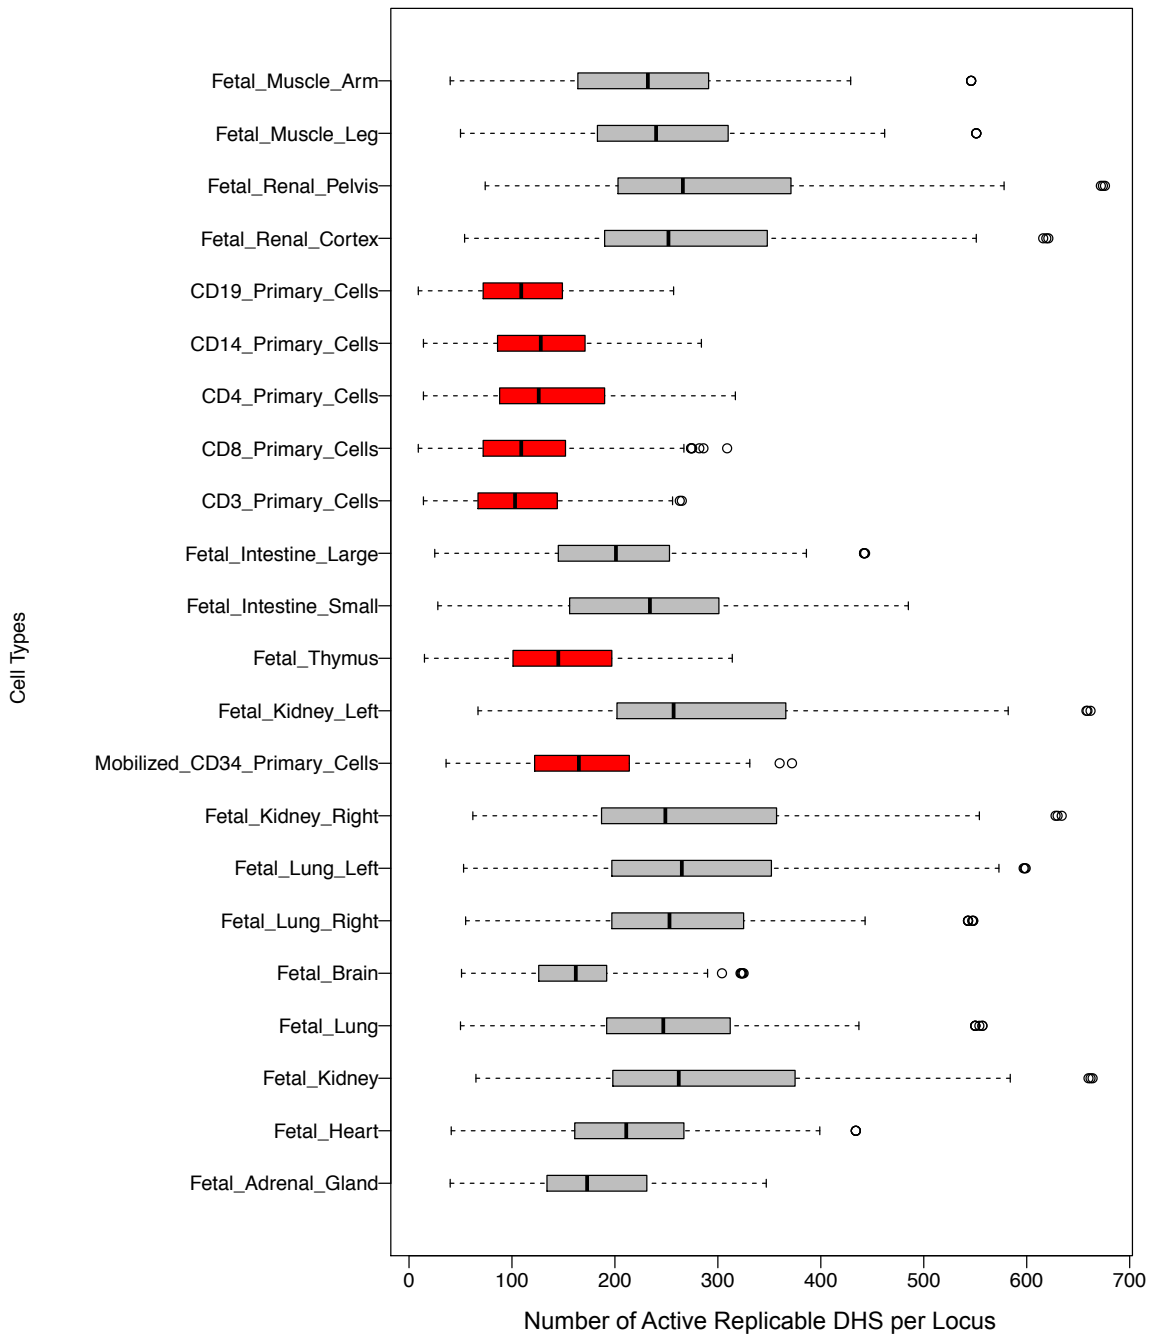

**Figure S10: Number of replicable DHS in each risk locus accessible in Roadmap Epigenomics Project tissues.** Different numbers of replicable DHS are accessible in each tissue. The immune cell subpopulations (red) have relatively low accessibility rates, indicating that the significant enrichment of risk signal that we observe on these DHS is not driven by sampling artifact.

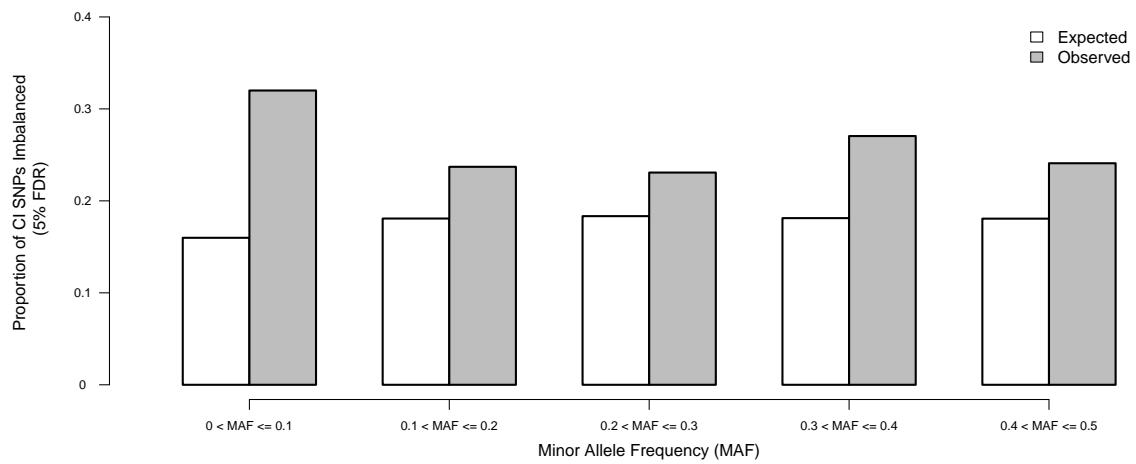

**Figure S11: Replicable DHS harboring credible interval (CI) SNPs are more likely to show allele-specific accessibility across 301 loci with genome-wide association to one of nine autoimmune and inflammatory diseases.** We observe that CI SNPs appear to alter the accessibility of replicable DHS in which they reside, and that this effect is independent of the minor allele frequency (MAF) of those SNPs.

A

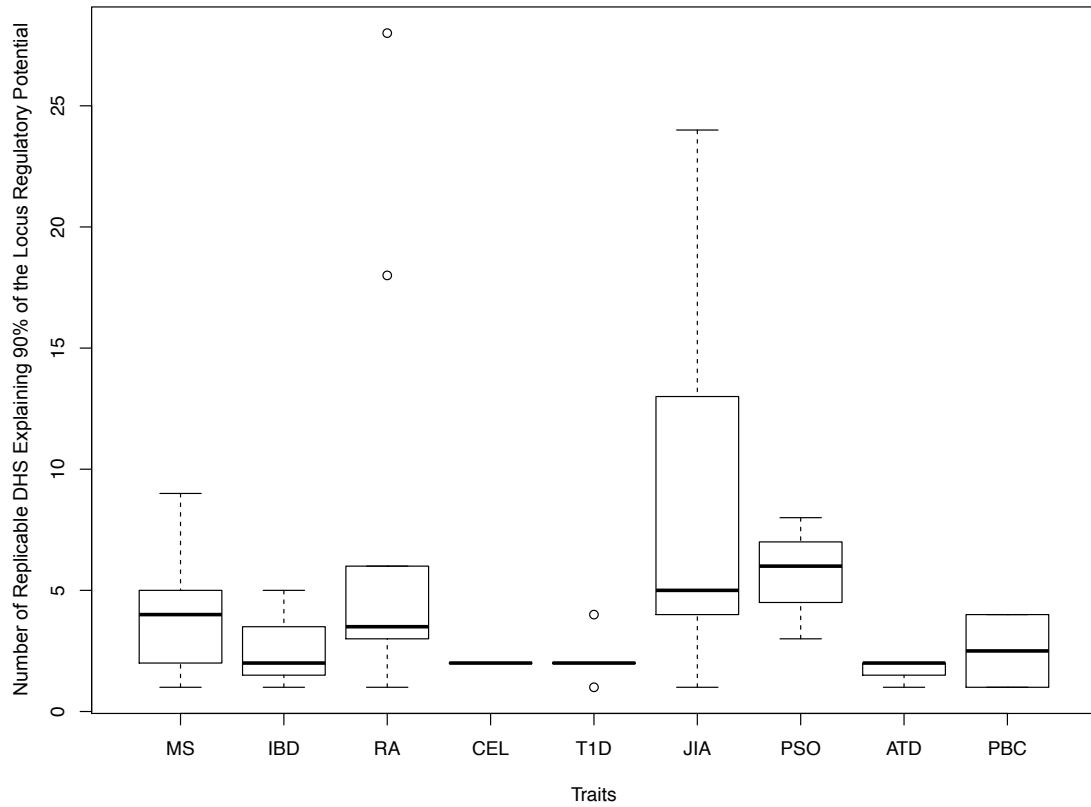

B

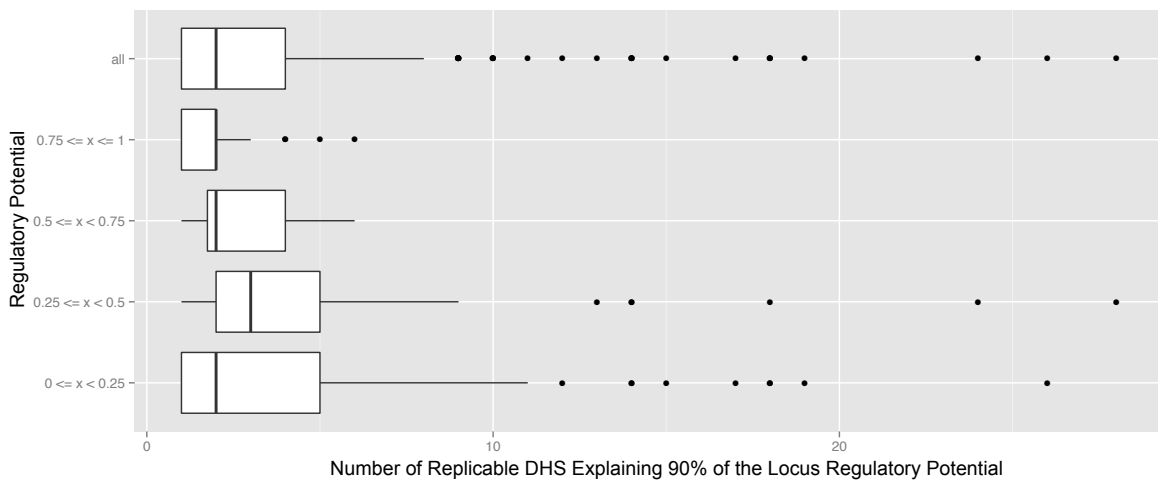

**Figure S12: Small numbers of replicable DHS explain > 90% of regulatory potential across 301 autoimmune and inflammatory disease risk loci.** We find that a median of 3 replicable DHS explain 90% of regulatory potential ( $\rho$ , the sum of posterior probabilities of association) across the nine diseases, whereas the risk loci contain a median of 822 replicable DHS (panel A). This is not affected by the overall value of  $\rho$  (panel B). We can thus substantially reduce the number of prioritized replicable DHS per locus.

A

### Number of Replicable DHS Correlated to Genes

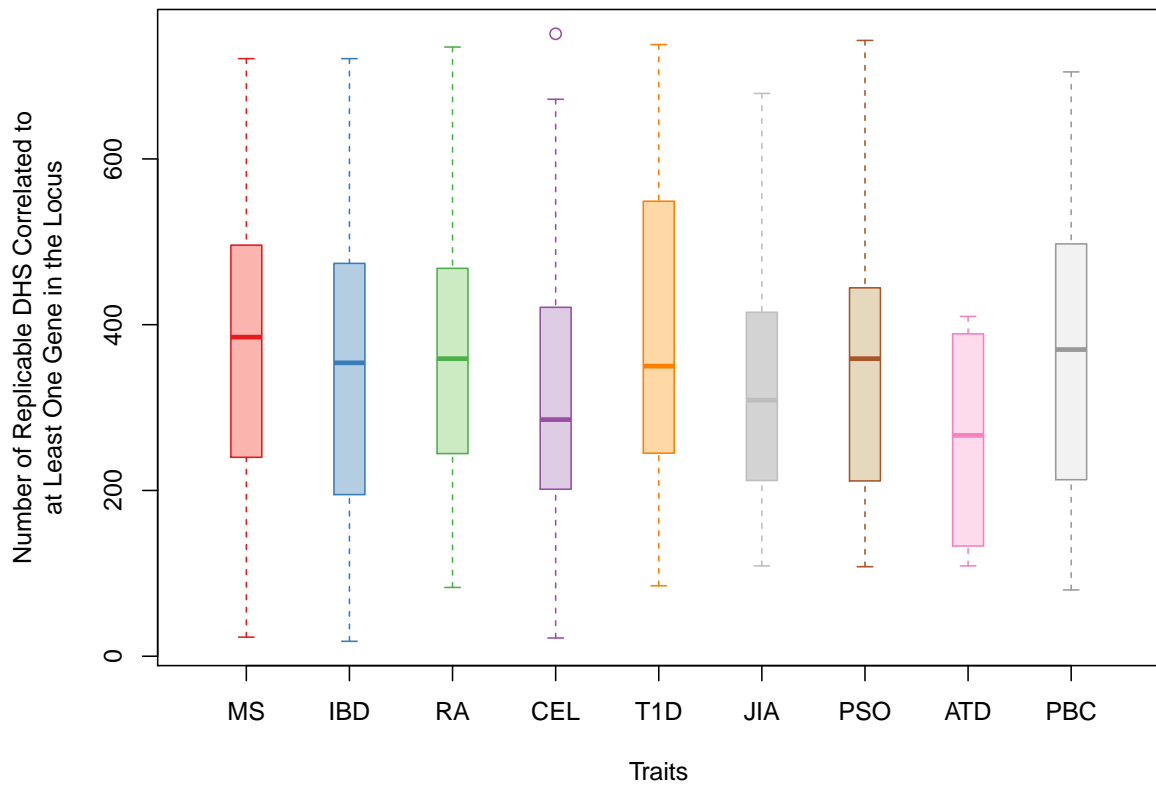

B

### Percentage of Replicable DHS Correlated to Genes

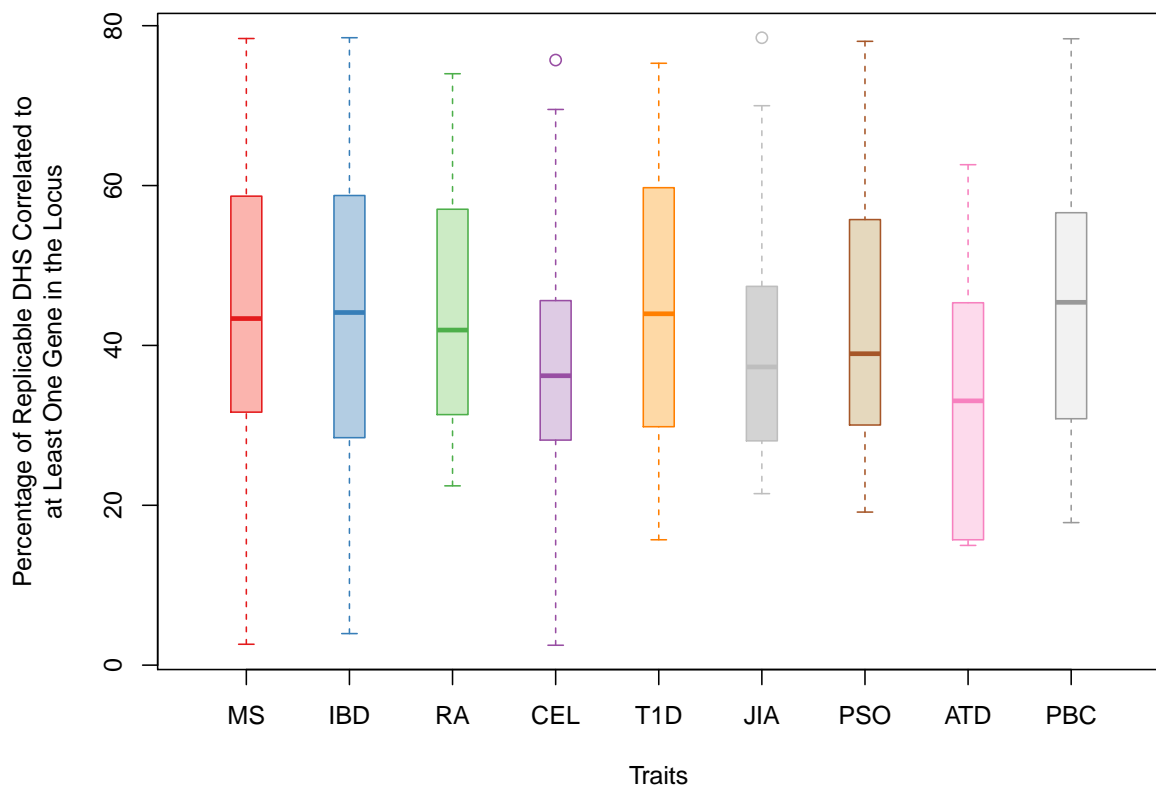

**Figure S13: Number and percentage of replicable DHS correlated to at least one gene across 301 autoimmune disease risk loci.** Across nine autoimmune and inflammatory diseases (each shown in a different color) we find that approximately half the replicable DHS in risk loci are correlated to the expression of at least one gene in the 2Mbp locus (DHS-gene correlation  $P < 0.05$ ).

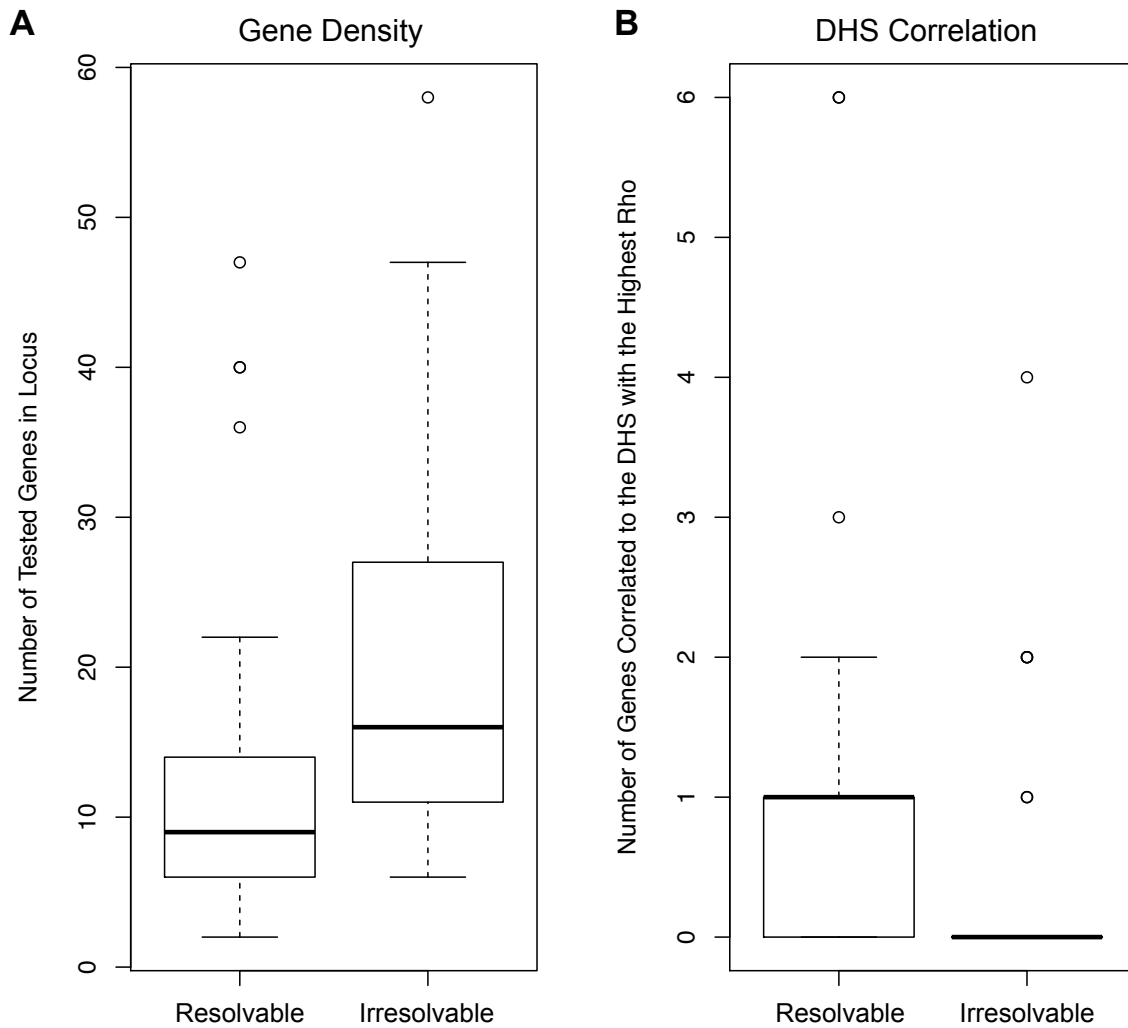

**Figure S14: DHS harboring associated variants in irresolvable loci are not correlated to gene expression.** We compared the 53/78 loci with significant  $\rho$  for which we could identify a single candidate gene to the 25 loci we could not resolve. (A) The 25 irresolvable loci harbor, on average, more genes than the 53 others. (B) We also find that the replicable DHS with the highest  $\rho$  in the 25 irresolvable loci are not correlated to the expression levels of genes in the region across the REMC, even before multiple testing correction for the number of genes encoded in each locus. This is in contrast to the 53 resolvable loci, where the replicable DHS with the highest  $\rho$  show strong correlation to at least one gene in the region. This lack of correlation for the 25 irresolvable loci suggests that these DHS do not influence any of the tested genes in that locus, rather than that we lack statistical power to resolve these 25 loci.

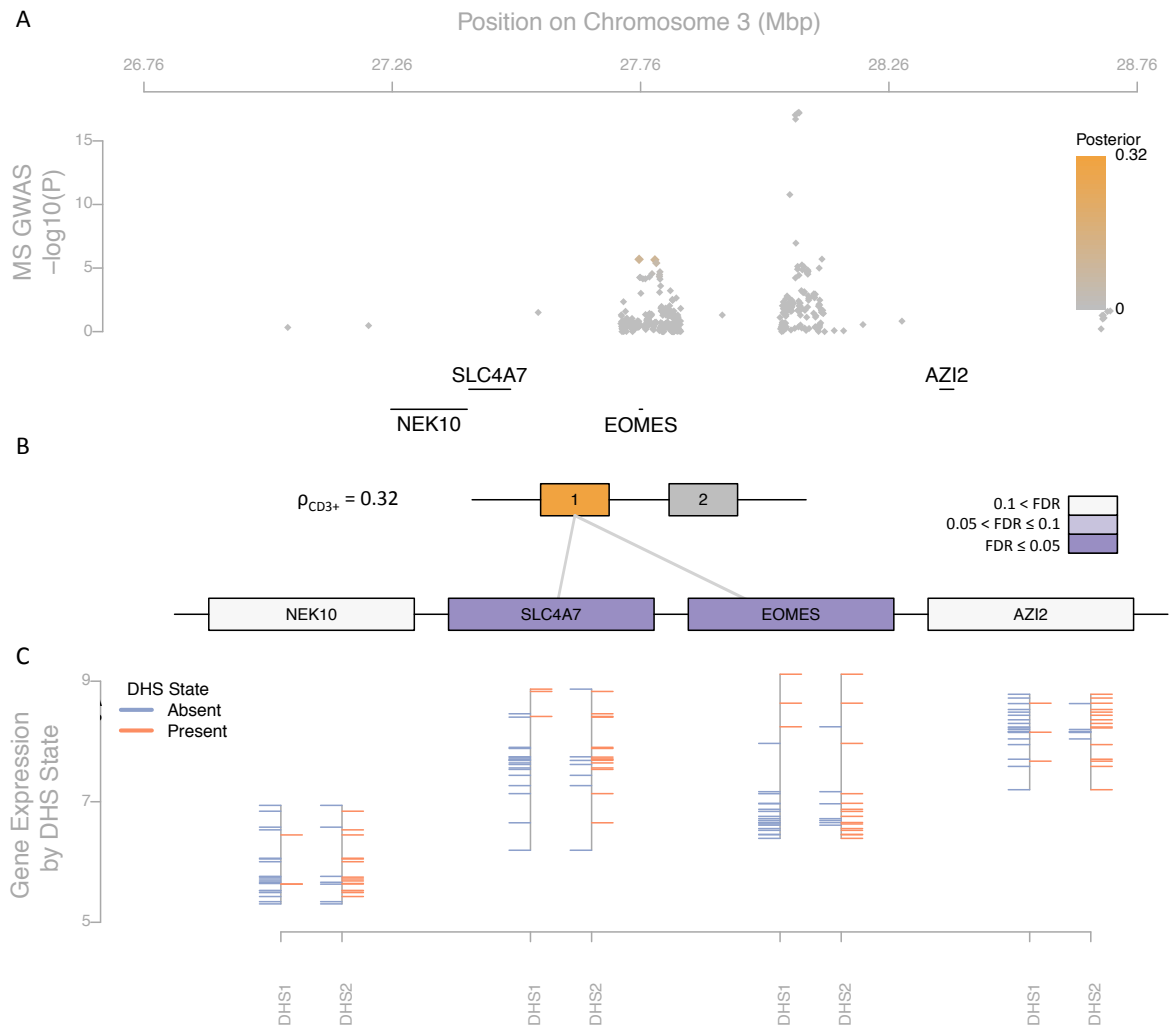

**Figure S15: Regulatory fine-mapping identifies a replicable DHS and changes to *EOMES* and *SLC4A7* regulation in  $CD3^+$  T cells as mediating multiple sclerosis risk on chromosome 3.** A genome-wide significant association to MS risk on chromosome 3 localizes to the *EOMES* locus (A). Different combinations of replicable DHS are active in each of the Roadmap Epigenomics Project tissues we examined; the enrichment is most significant in replicable DHS active in  $CD3^+$  T cells (32% of the overall posterior probability; FDR < 0.1, panel B). By partitioning the posterior probability of association attributable to each replicable DHS by the strength of this correlation, we find that *EOMES* and *SLC4A7* show significant enrichment (purple, FDR < 0.05). The expression levels of the two genes are markedly higher in tissues where the replicable DHS we identify is accessible (orange) than in tissues where it is inaccessible (blue; panel C).





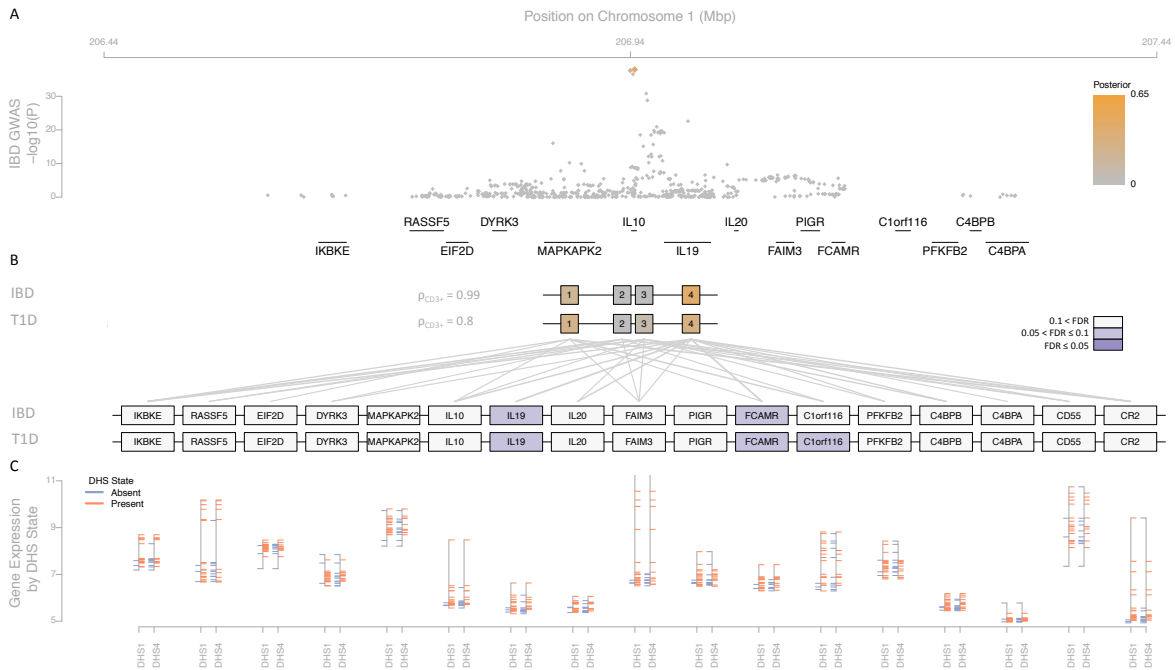

**Figure S17: Regulatory fine-mapping on chromosome 1 identifies two replicable DHS and changes to *IL19* and *FCAMR* regulation in  $CD3^+$  T cells, as driving risk to IBD and T1D.** Association to IBD and T1D localizes to the coding region of *IL10* (IBD shown in panel A). We found significant regulatory potential in  $CD3^+$  T cell subsets for both diseases, which independently localize to the same replicable DHS in the two diseases and explain 99% and 80% of IBD and RA posterior probability of association, respectively (panel B). In each case, we can independently prioritize *IL19* and *FCAMR* regulation in  $CD3^+$  T cells. The expression levels of both genes are markedly higher in tissues where the two replicable DHS we identify are accessible (orange) than in tissues where they are inaccessible (blue; panel C).

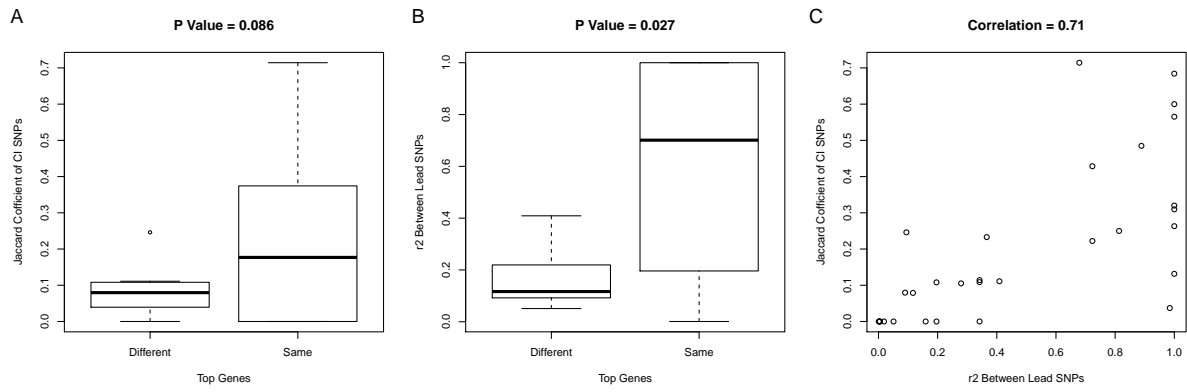

**Figure S18: Comparing prioritized genes identified for pairs of traits at the shared loci.** By comparing the prioritized genes at the shared loci, we found that pairs of traits with (A) higher similarity between their CI SNPs, and (B) higher LD between their lead SNPs tend to target the same genes more often. (C) LD between lead SNPs and the similarity between CI SNPs (measured by Jaccard coefficient) are correlated.

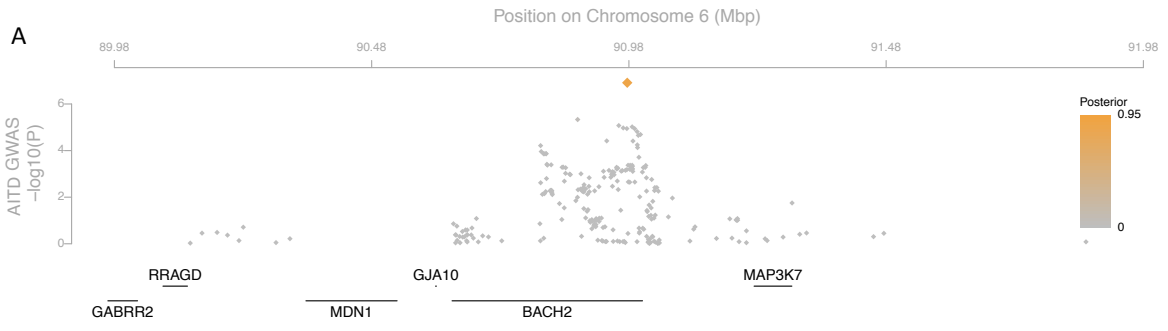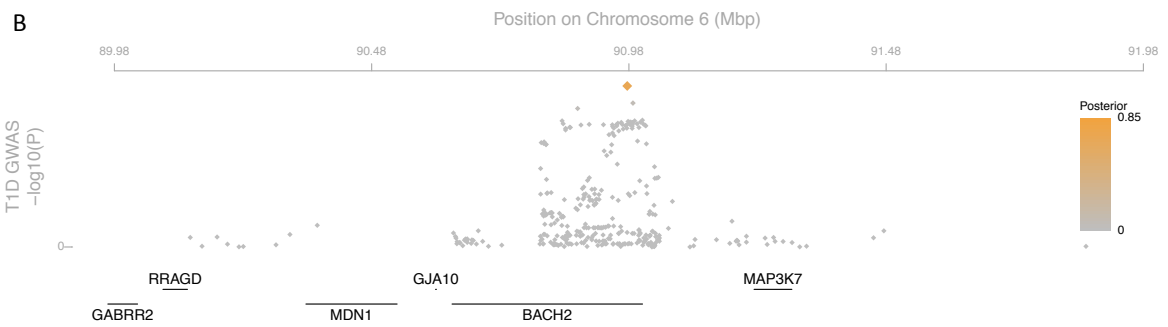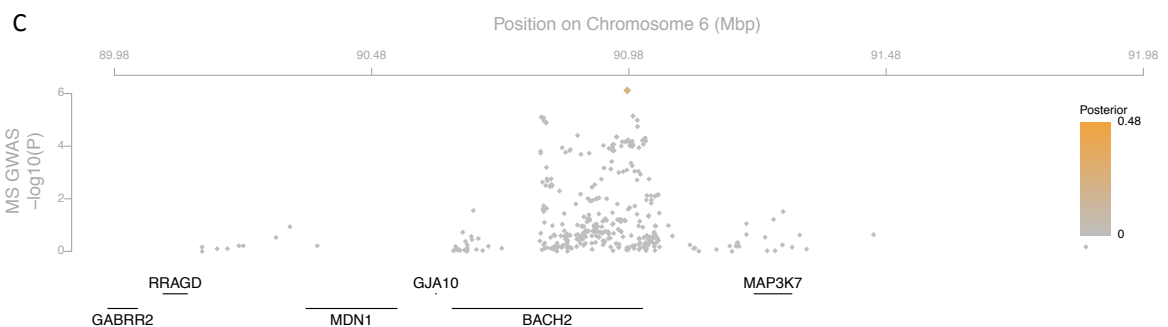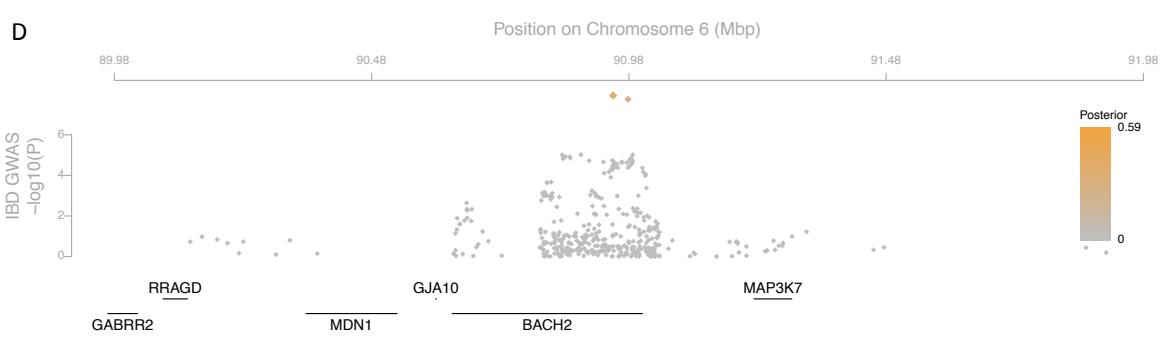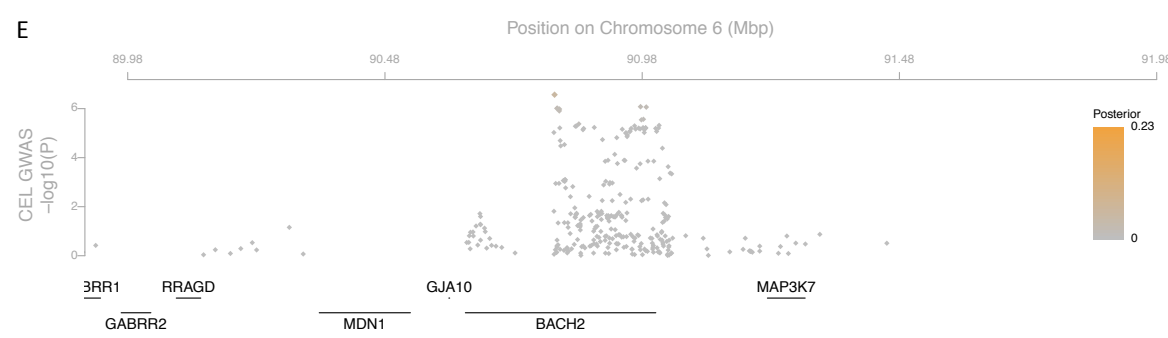

**Figure S19: genetic association data in the BACH2 locus on chromosome 6 for five autoimmune and inflammatory diseases.** We show genetic association data for AITD, T1D, MS, IBD and celiac disease, which we cannot conveniently display in figure 3 of the main paper. The first three traits show significant regulatory potential  $\rho$  in CD3<sup>+</sup> T cells in this locus, and each independently shows significant evidence for the role of *MDN1* in disease risk. The last two traits show no significant  $\rho$  or  $\gamma$  in any tissue.

## Legends of Supplemental Tables

**Table S1: Roadmap Epigenomics Project tissues used in our analyses.** We used 56 tissues with at least two replicate samples, of which 22 had matched expression data (top panel). Samples from immune subpopulations are shown in bold font.

**Table S2: Replicable DHS harboring credible interval SNPs across 301 loci associated to nine autoimmune and inflammatory disease loci.** A total of 1954 replicable DHS (1470 unique) harbor at least one credible interval SNP. The last column gives the total posterior probability attributable to all SNPs on each replicable DHS (though the vast majority have exactly one SNP).

**Table S3: Regulatory fine-mapping in 301 disease risk loci across nine autoimmune and inflammatory diseases.** For each disease, we give the most associated SNP, the exact coordinates of each locus, the number of replicable DHS, credible interval (CI) SNPs, and genes in the locus, the total number of DHS harboring a CI SNP, and the total regulatory potential ( $\rho$ ) attributable to all these replicable DHS. Then, for each locus, we show each Roadmap Epigenome Mapping Consortium tissue with significant excess of regulatory potential (FDR < 0.1), indicating the total number of replicable DHS in the locus active in the tissue, the number of these harboring CI SNPs, the sum of  $\rho$  they account for, and the p-value of the enrichment test. Finally, within each of these tissues, we show each gene with significant pathogenicity factor  $\gamma$  (FDR < 0.1) with the accompanying p-value.

**Table S4: Regulatory fine-mapping indicates risk variants for multiple diseases in the same loci affect the same genes.** In 25 loci harboring associations to exactly two diseases each, we find that the most associated variants are often different (top row). However, the credible interval sets in these loci overlap significantly (hypergeometric  $p < 0.001$ , second row), and this overlap is greater than that of the most associated variants alone (increase in Jaccard coefficient). This overlap is also true when comparing the subset of CI SNPs on DHS and for the number of DHS harboring a CI SNP across diseases (third and fourth rows). When we compare prioritized genes, we see further increase in overlap relative to most associated variants *and* to prioritized DHS (bottom row). Thus, identifying risk-mediating genes partially overcomes the limited resolution of analyses only focusing on genetic association data.

|                                                               |                                                                                                                                                                                                                                                                                                                                                                                                                                                                                                                                                                                                                                                                                                                                                                                                                                                                                                                                                                                                                                                                                                                                  |
|---------------------------------------------------------------|----------------------------------------------------------------------------------------------------------------------------------------------------------------------------------------------------------------------------------------------------------------------------------------------------------------------------------------------------------------------------------------------------------------------------------------------------------------------------------------------------------------------------------------------------------------------------------------------------------------------------------------------------------------------------------------------------------------------------------------------------------------------------------------------------------------------------------------------------------------------------------------------------------------------------------------------------------------------------------------------------------------------------------------------------------------------------------------------------------------------------------|
| <p><b>Cell Types with Matched DHS and Gene Expression</b></p> | <p><b>CD14 Primary Cells</b><br/> <b>CD19 Primary Cells</b><br/> <b>CD3 Primary Cells</b><br/> <b>CD4 Primary Cells</b><br/> <b>CD8 Primary Cells</b><br/> <b>Fetal Thymus</b><br/> <b>Mobilized CD34 Primary Cells</b><br/> Fetal Adrenal Gland<br/> Fetal Brain<br/> Fetal Heart<br/> Fetal Large Intestine<br/> Fetal Small Intestine<br/> Fetal Kidney<br/> Fetal Left Kidney<br/> Fetal Right Kidney<br/> Fetal Lung<br/> Fetal Left Lung<br/> Fetal Right Lung<br/> Fetal Arm Muscle<br/> Fetal Leg Muscle<br/> Fetal Renal Cortex<br/> Fetal Renal Pelvis</p>                                                                                                                                                                                                                                                                                                                                                                                                                                                                                                                                                             |
| <p><b>Cell Types with DHS Data Only</b></p>                   | <p><b>Mobilized CD3 Primary Cells</b><br/> <b>Mobilized CD4 Primary Cells</b><br/> <b>CD56 Primary Cells</b><br/> Breast vHMEC<br/> Fetal Back Muscle<br/> Fetal Trunk Muscle<br/> Fetal Placenta<br/> Fetal Left Renal Cortex<br/> Fetal Right Renal Cortex<br/> Fetal Left Renal Pelvis<br/> Fetal Right Renal Pelvis<br/> Fetal Spinal Cord<br/> Fetal Stomach<br/> Fetal Testes<br/> Fibroblasts Fetal Skin (Abdomen)<br/> Fibroblasts Fetal Skin (Back)<br/> Fibroblasts Fetal Skin (Left Biceps)<br/> Fibroblasts Fetal Skin (Right Biceps)<br/> Fibroblasts Fetal Skin (Left Quadriceps)<br/> Fibroblasts Fetal Skin (Right Quadriceps)<br/> Fibroblasts Fetal Skin (Scalp)<br/> Fibroblasts Fetal Skin (Upper Back)<br/> Gastric<br/> H1<br/> H1 - BMP4 Derived Mesendoderm Cultured Cells<br/> H1 - BMP4 Derived Trophoblast Cultured Cells<br/> H1 - Derived Mesenchymal Stem Cells<br/> H1 - Derived Neuronal Progenitor Cultured Cells<br/> H9<br/> IMR90<br/> Pancreas<br/> Penis Foreskin Fibroblast Primary Cells<br/> Penis Foreskin Keratinocyte Primary Cells<br/> Penis Foreskin Melanocyte Primary Cells</p> |

**Table S1: Roadmap Epigenomics Project tissues used in our analyses.** We used 56 tissues with at least two replicate samples, of which 22 had matched expression data (top panel). Samples from immune subpopulations are shown in bold font.

|                                             | Concordance | Discordance | Jaccard Coefficient |
|---------------------------------------------|-------------|-------------|---------------------|
| Number of Most Associated SNPs              | 3           | 22          | 0.12                |
| Number of CI SNPs (mean)                    | 14.4        | 59.44       | 0.21                |
| Number of Prioritized CI SNPs (mean)        | 4           | 13.36       | 0.26                |
| Number of Prioritized Replicable DHS (mean) | 3.52        | 11.8        | 0.28                |
| Number of Prioritized Genes (mean)          | 1.88        | 2.75        | 0.39                |

**Table S4: Regulatory fine-mapping indicates risk variants for multiple diseases in the same loci affect the same genes.** In 25 loci harboring associations to exactly two diseases each, we find that the most associated variants are often different (top row). However, the credible interval sets in these loci overlap significantly (hypergeometric  $p < 0.001$ , second row), and this overlap is greater than that of the most associated variants alone (increase in Jaccard coefficient). This overlap is also true when comparing the subset of CI SNPs on DHS and for the number of DHS harboring a CI SNP across diseases (third and fourth rows). When we compare prioritized genes, we see further increase in overlap relative to most associated variants *and* to prioritized DHS (bottom row). Thus, identifying risk-mediating genes partially overcomes the limited resolution of analyses only focusing on genetic association data.
